# Supplementary material for: Cyclometallated platinum(ii) complexes of benzylidene-2,6-di-isopropylphenylamine containing bidentate phosphines: synthesis, structural properties and reactivity studies
Source: Royal Society of Chemistry journal article supplement (doi:10.1039/c4dt02375g), 2014-11-19
Supplement: c4dt02375g1.pdf [file c4dt02375g1.pdf]

## Supporting Information

# **Cyclometallated platinum(II) complexes based on bidentate phosphines: Synthesis, structural properties and reactivity studies**

**Feng Zheng<sup>a,c</sup>, Alan T. Hutton<sup>a</sup>, Cornelia G.C.E. van Sittert<sup>b</sup>, Wilhelmus J. Gerber<sup>c</sup> and Selwyn F. Mapolie<sup>\*c</sup>**

<sup>a</sup> Department of Chemistry, University of Cape Town, Private Bag, Rondebosch, 7700, South Africa.

<sup>b</sup> Catalysis and Synthesis Research Group, Chemical Resource Beneficiation Focus Area, North-West University, Potchefstroom, 2520, South Africa

<sup>c</sup> Department of Chemistry and Polymer Science, Stellenbosch University, Private Bag, Matieland, 7601, Stellenbosch, South Africa.

Corresponding author: Email [smapolie@sun.ac.za](mailto:smapolie@sun.ac.za)

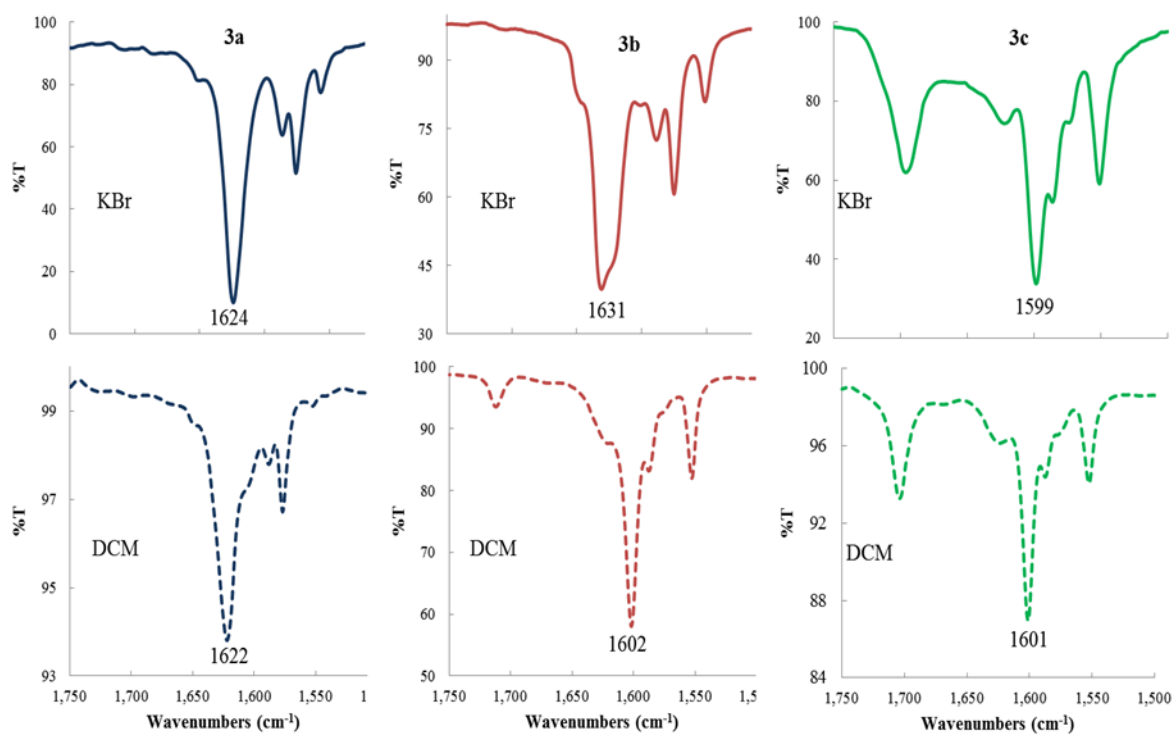

**Figure S1.** IR spectra for the mononuclear complexes as KBr pellet and in DCM.

**Table S1.** Molar conductivities ( $\Omega^{-1} \cdot \text{cm}^2 \cdot \text{mol}^{-1}$ ) of mononuclear Pt(II) complexes with different bidentate phosphine in dichloromethane

| Complex               | Concentration<br>(mM) | k<br>(mS.cm <sup>-1</sup> ) | $\Lambda_M$<br>( $\Omega^{-1} \cdot \text{cm}^2 \cdot \text{mol}^{-1}$ ) |
|-----------------------|-----------------------|-----------------------------|--------------------------------------------------------------------------|
| <b>3a</b> (dppf-mono) | 1.10                  | 0.32                        | 0.3                                                                      |
| <b>3b</b> (dppe-mono) | 1.14                  | 66.1                        | 58.0                                                                     |
| <b>3c</b> (dppm-mono) | 1.18                  | 58.0                        | 49.2                                                                     |
| <b>2c</b> (dppm-di)   | 0.98                  | 0.16                        | 0.2                                                                      |
| DCM                   |                       | 0.01                        |                                                                          |

**Table S2.** The relevant structural parameters for complexes containing dppf ligand

|                                                        | <b>2a</b>  | <b>3a</b>  |
|--------------------------------------------------------|------------|------------|
| $\tau$ ( $^{\circ}$ ) <sup>a</sup>                     | 143.5      | 39.2       |
| $\theta$ ( $^{\circ}$ ) <sup>b</sup>                   | 0.2        | 0.2        |
| $X_A \cdots Fe \cdots X_B$ ( $^{\circ}$ ) <sup>c</sup> | 174.4      | 177.7      |
| $P \cdots Fe \cdots P$ ( $^{\circ}$ )                  | 154.6      | 62.4       |
| $P \cdots P$ (Å)                                       | 6.84       | 3.50       |
| $M-P$ (Å)                                              | 2.23, 2.23 | 2.23, 2.35 |
| $Fe \cdots M$ (Å)                                      | 4.39       | 4.24       |

<sup>a</sup> The torsion angle CA-XA-XB-CB, where C is the carbon bonded to the P and X is the centroid.

<sup>b</sup> The dihedral angle between the two Cp rings. <sup>c</sup> Centroid-Fe-centroid

**Table S3.** Crystal data and structure refinement for complexes **2a**, **2c**, **3a** and **3b**.

|                                                  | <b>2a</b>                                                                                                                         | <b>2c</b>                                                                                     | <b>3a</b>                                              | <b>3b</b>                                             |
|--------------------------------------------------|-----------------------------------------------------------------------------------------------------------------------------------|-----------------------------------------------------------------------------------------------|--------------------------------------------------------|-------------------------------------------------------|
| Empirical formula                                | C <sub>72</sub> H <sub>72</sub> Cl <sub>2</sub> FeN <sub>2</sub> P <sub>2</sub> Pt <sub>2</sub> + CH <sub>2</sub> Cl <sub>2</sub> | C <sub>63</sub> H <sub>66</sub> Cl <sub>2</sub> N <sub>2</sub> P <sub>2</sub> Pt <sub>2</sub> | C <sub>53</sub> H <sub>50</sub> ClFeNP <sub>2</sub> Pt | C <sub>48</sub> H <sub>52</sub> CINOP <sub>2</sub> Pt |
| <i>Mr</i> (g/mol)                                | 1629.09                                                                                                                           | 1374.20                                                                                       | 1049.27                                                | 951.39                                                |
| Crystal system                                   | Orthorhombic                                                                                                                      | Monoclinic                                                                                    | monoclinic                                             | Monoclinic                                            |
| Space group                                      | Ccca                                                                                                                              | P21/n                                                                                         | P21/c                                                  | P21/c                                                 |
| a (Å)                                            | 21.2184(18)                                                                                                                       | 12.4432(5)                                                                                    | 11.827(2)                                              | 9.8055(5)                                             |
| b (Å)                                            | 37.581(3)                                                                                                                         | 17.0241(7)                                                                                    | 21.120(4)                                              | 39.311(2)                                             |
| c (Å)                                            | 17.8803(14)                                                                                                                       | 26.2651(11)                                                                                   | 18.536(4)                                              | 11.2304(6)                                            |
| α (°)                                            | 90                                                                                                                                | 90                                                                                            | 90                                                     | 90                                                    |
| β (°)                                            | 90                                                                                                                                | 96.9040(10)                                                                                   | 103.533(3)                                             | 101.2840(10)                                          |
| γ (°)                                            | 90                                                                                                                                | 90                                                                                            | 90                                                     | 90                                                    |
| V (Å <sup>3</sup> )                              | 14258(2)                                                                                                                          | 5523.5(4)                                                                                     | 4501.6(15)                                             | 4245.3(4)                                             |
| Z                                                | 8                                                                                                                                 | 4                                                                                             | 4                                                      | 4                                                     |
| Reflections collected/ Unique                    | 145930/10069                                                                                                                      | 35293/13187                                                                                   | 29083 / 10803                                          | 92919/11079                                           |
| R(int)                                           | 0.0869                                                                                                                            | 0.0438                                                                                        | 0.0754                                                 | 0.0647                                                |
| Data/restraints/parameters                       | 10069/0/379                                                                                                                       | 13187/0/648                                                                                   | 10803/42/552                                           | 110790/0/493                                          |
| Final R indices [I>2σ(I)]                        | 0.0362, 0.1015                                                                                                                    | 0.0320, 0.0577                                                                                | 0.0477, 0.0850                                         | 0.0288, 0.0495                                        |
| Largest diff. peak and hole (e.Å <sup>-3</sup> ) | 13.446, -1.065                                                                                                                    | 0.888, -1.057                                                                                 | 1.292, -0.764                                          | 0.494, -0.787                                         |

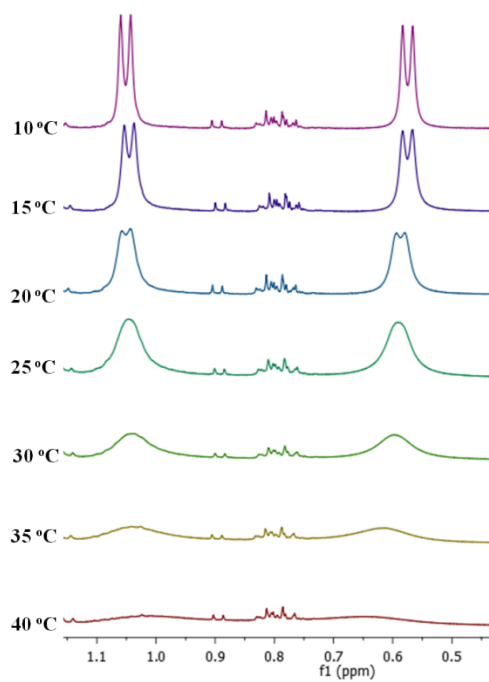

**Figure S2.** Variable-temperature <sup>1</sup>H NMR in *iso*-propyl methyl region of **3c** in CDCl<sub>3</sub>.

**Table S4.** cyclic voltammetry parameters in V for (dppf)PtL complexes

|           | $E^1_{pa}$ | $E^1_{pc}$ | $E^2_{pa}$ | $E^2_{pc}$ | $E^1_{1/2}$ | $E^2_{1/2}$ |
|-----------|------------|------------|------------|------------|-------------|-------------|
| dppf      | 0.487      | 0.433      | 1.10       | 0.980      | 0.460       | 1.04        |
| <b>2a</b> | 0.654      | 0.480      |            |            | 0.567       |             |
| <b>3a</b> | 0.765      | 0.711      | 0.785      | 0.711      | 0.738       | 0.748       |



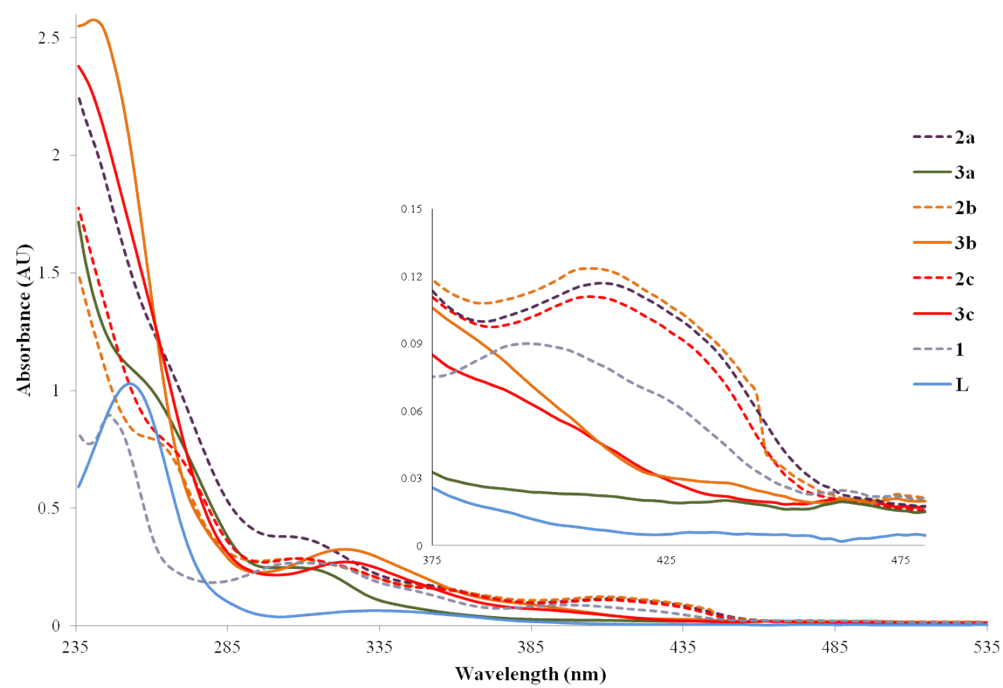

**Figure S3.** UV-Vis absorption spectra of the cyclometallated Pt complexes with bidentate phosphines, the dmsso precursor and the free ligand in  $\text{CH}_2\text{Cl}_2$  ( $10^{-4}$  M) at 298 K.

**Table S5.** Absorption data for complexes **1 – 3** and the free ligand in CH<sub>2</sub>Cl<sub>2</sub> (ca. 2 x 10<sup>-5</sup> M in Pt concentration) at 298 K.

| complex   | c (10 <sup>-5</sup> M) | λ <sub>max</sub> (nm) | A          | ε (M <sup>-1</sup> .cm <sup>-1</sup> ) |
|-----------|------------------------|-----------------------|------------|----------------------------------------|
| <b>L</b>  | 2.04                   | 252                   | 1.02731    | 50400                                  |
|           |                        | 340                   | 0.0625149  | 3060                                   |
| <b>1</b>  | 2.16                   | 246                   | 0.916192   | 42400                                  |
|           |                        | 320                   | 0.26081    | 12100                                  |
|           |                        | 400                   | 0.0888667  | 4110                                   |
| <b>2a</b> | 1.06                   | 310                   | 0.374105   | 35300                                  |
|           |                        | 412                   | 0.116691   | 11000                                  |
| <b>2b</b> | 1.12                   | 264                   | 0.764676   | 68300                                  |
|           |                        | 310                   | 0.284136   | 25400                                  |
|           |                        | 412                   | 0.12279495 | 11000                                  |
| <b>2c</b> | 0.98                   | 268                   | 0.74023    | 75500                                  |
|           |                        | 310                   | 0.286552   | 29200                                  |
|           |                        | 414                   | 0.10879    | 11100                                  |
| <b>3a</b> | 2.02                   | 258                   | 1.03554    | 51300                                  |
|           |                        | 314                   | 0.239301   | 11800                                  |
| <b>3b</b> | 2.28                   | 242                   | 2.57213    | 113000                                 |
|           |                        | 324                   | 0.325564   | 14300                                  |
| <b>3c</b> | 2.36                   | 324                   | 0.272781   | 11600                                  |

**Table S6.** Excitation and emission data for Pt complexes

| Complex   | $\lambda_{\text{ex}}$ (nm) | $\lambda_{\text{em}}$ (nm)                            |
|-----------|----------------------------|-------------------------------------------------------|
| <b>1</b>  | 334 <sub>max</sub> , 400   | 530 <sub>max</sub> , 568 ( $\lambda_{\text{ex}}$ 334) |
| <b>2b</b> | 400 <sub>max</sub> , 298   | 434, 532 <sub>max</sub> , 568(sh)                     |
| <b>2c</b> | 400                        | 532 <sub>max</sub> , 572(sh)                          |
| <b>3b</b> | 282                        | 310 <sub>max</sub> , 568(sh)                          |
| <b>3c</b> | 284                        | 452 <sub>max</sub> , 490(sh), 564                     |

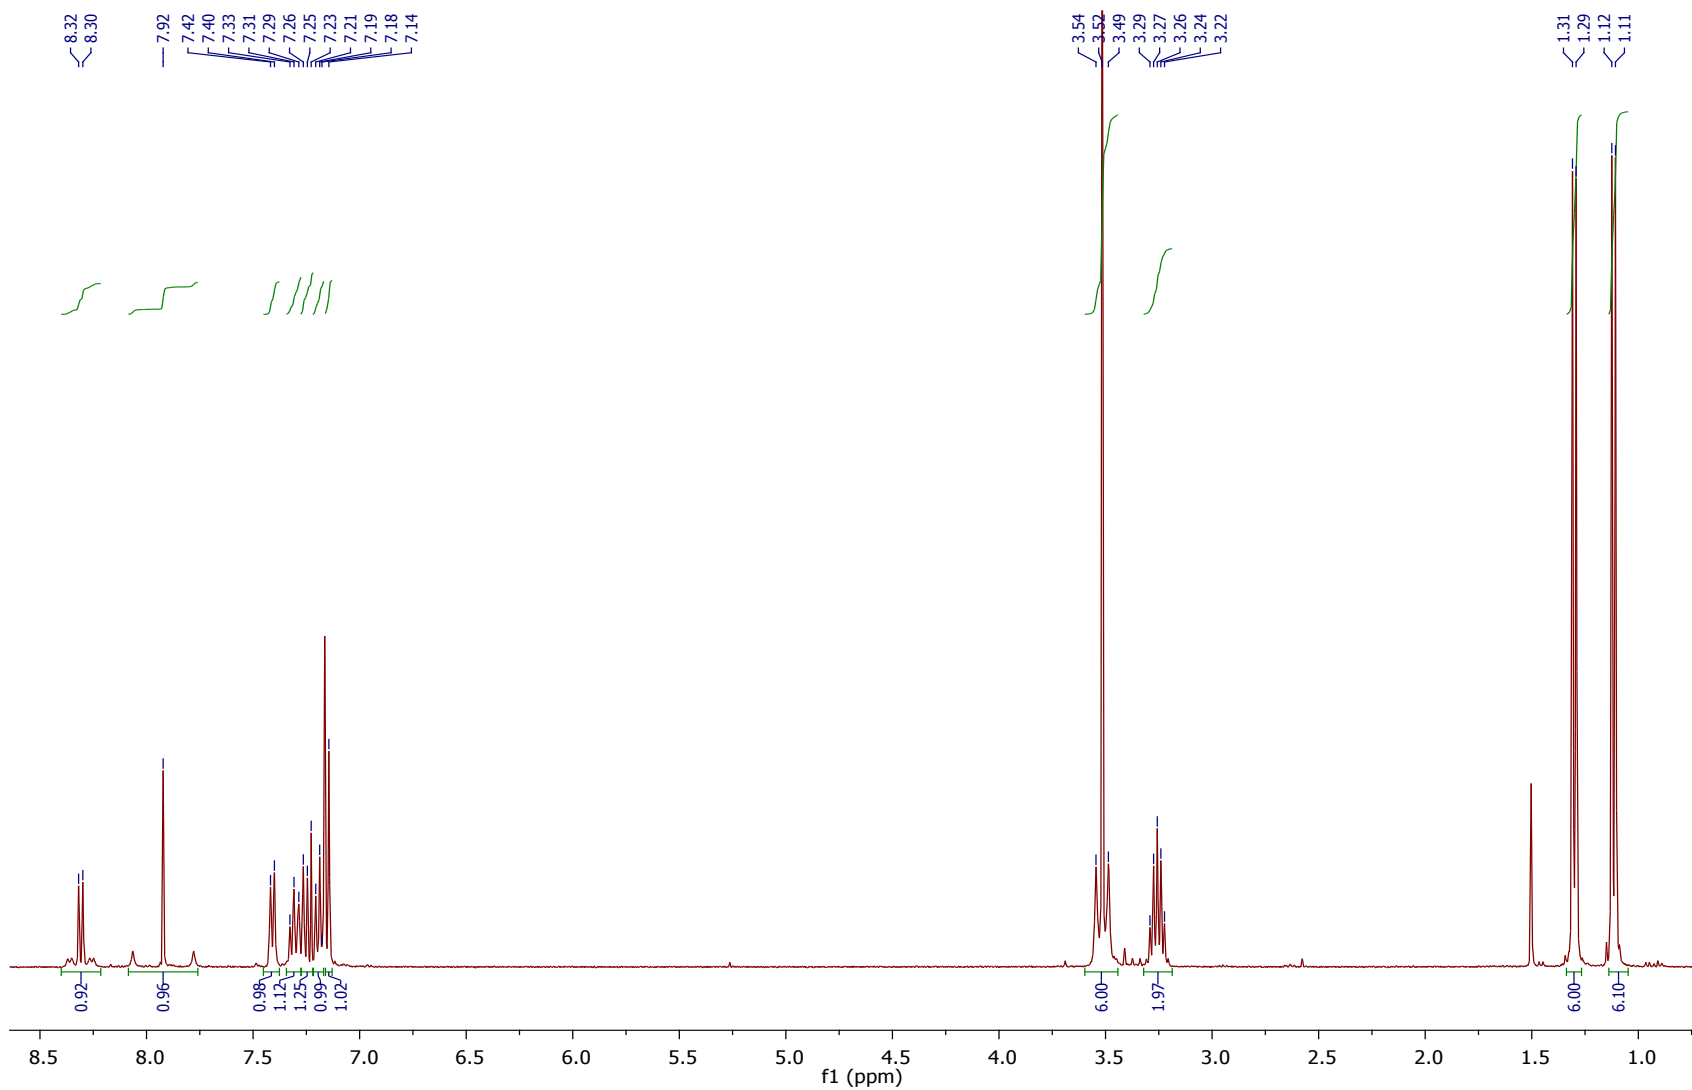

Figure S4.  $^1\text{H}$  NMR spectra of **1**

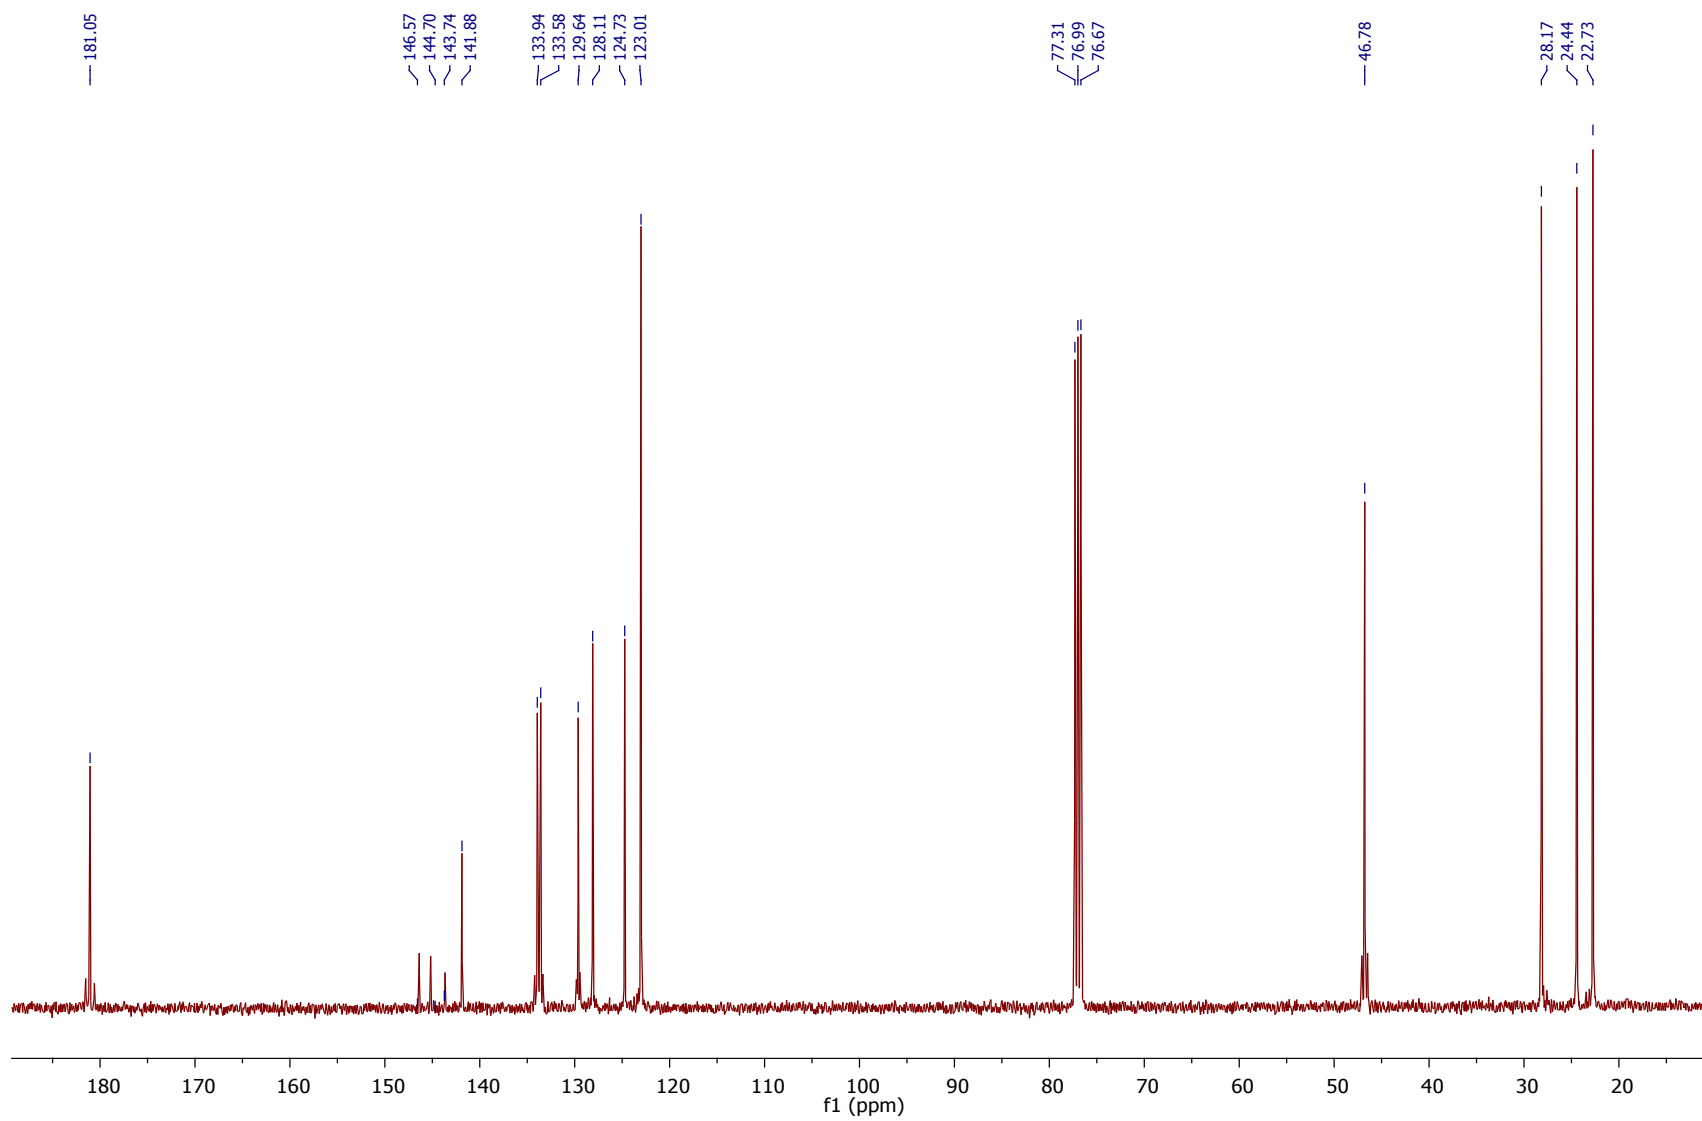

Figure S5.  $^{13}\text{C}$  NMR spectra of **1**

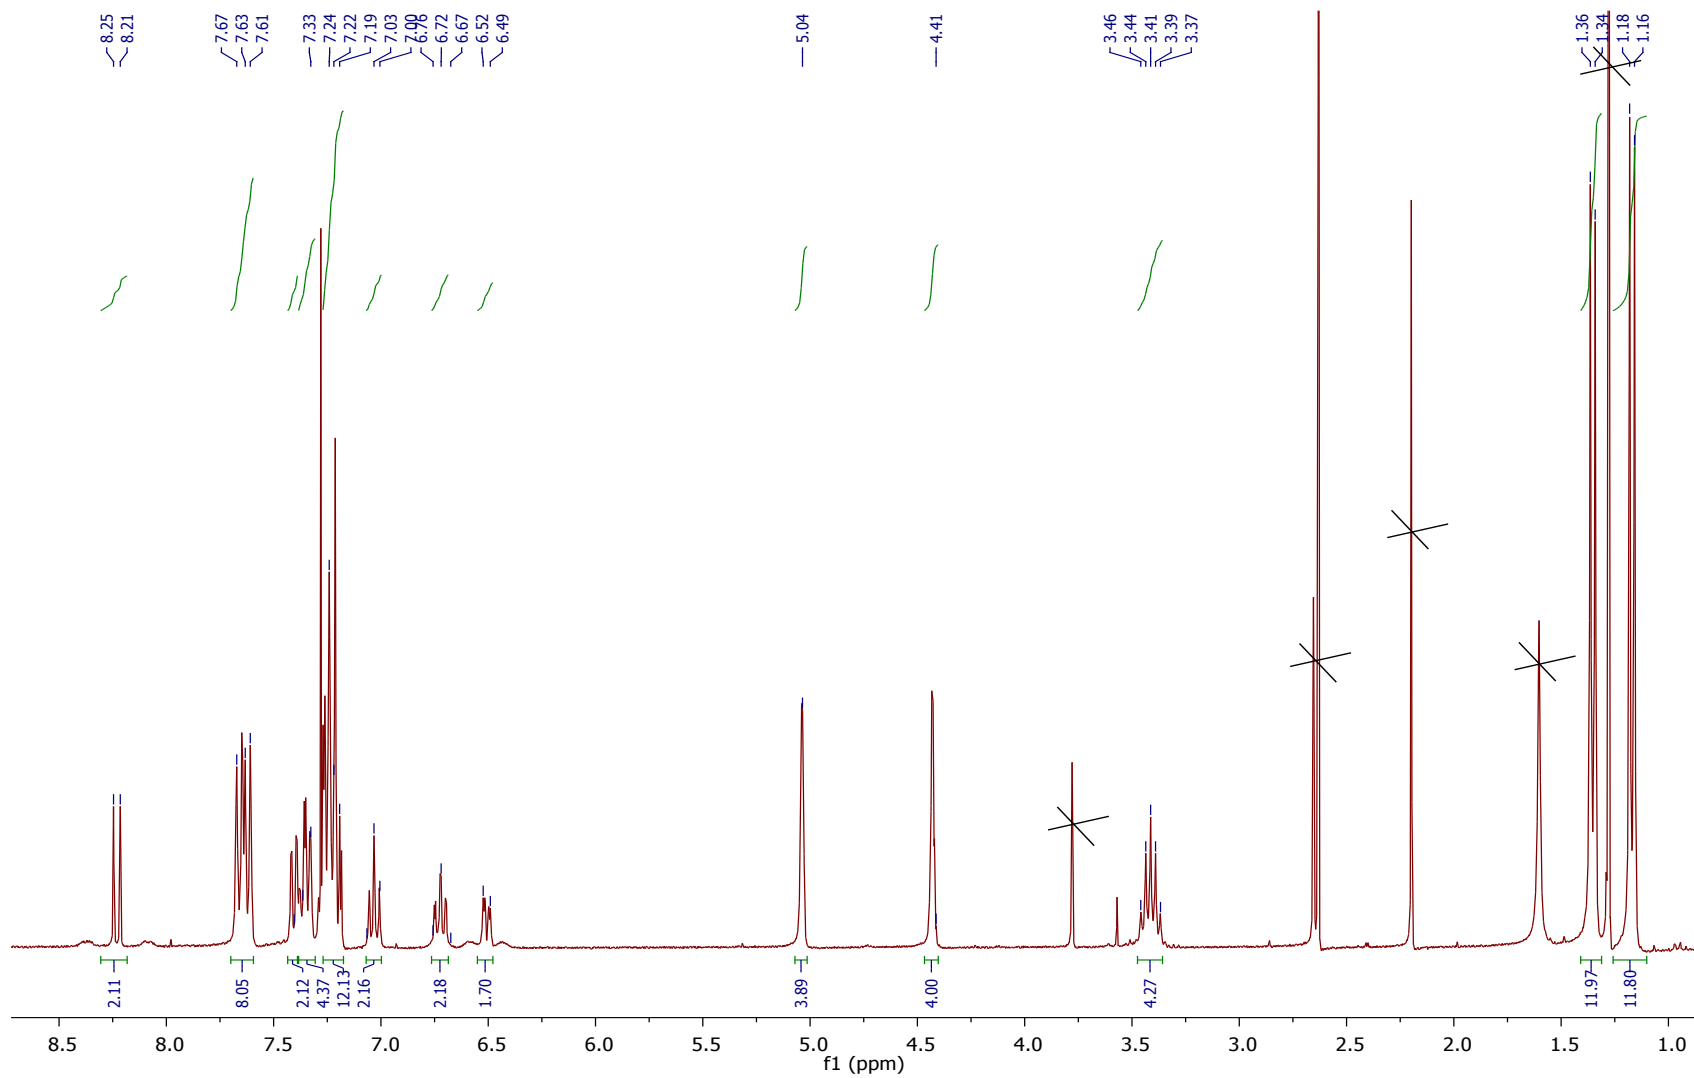

Figure S6.  $^1\text{H}$  NMR spectra of **2a**

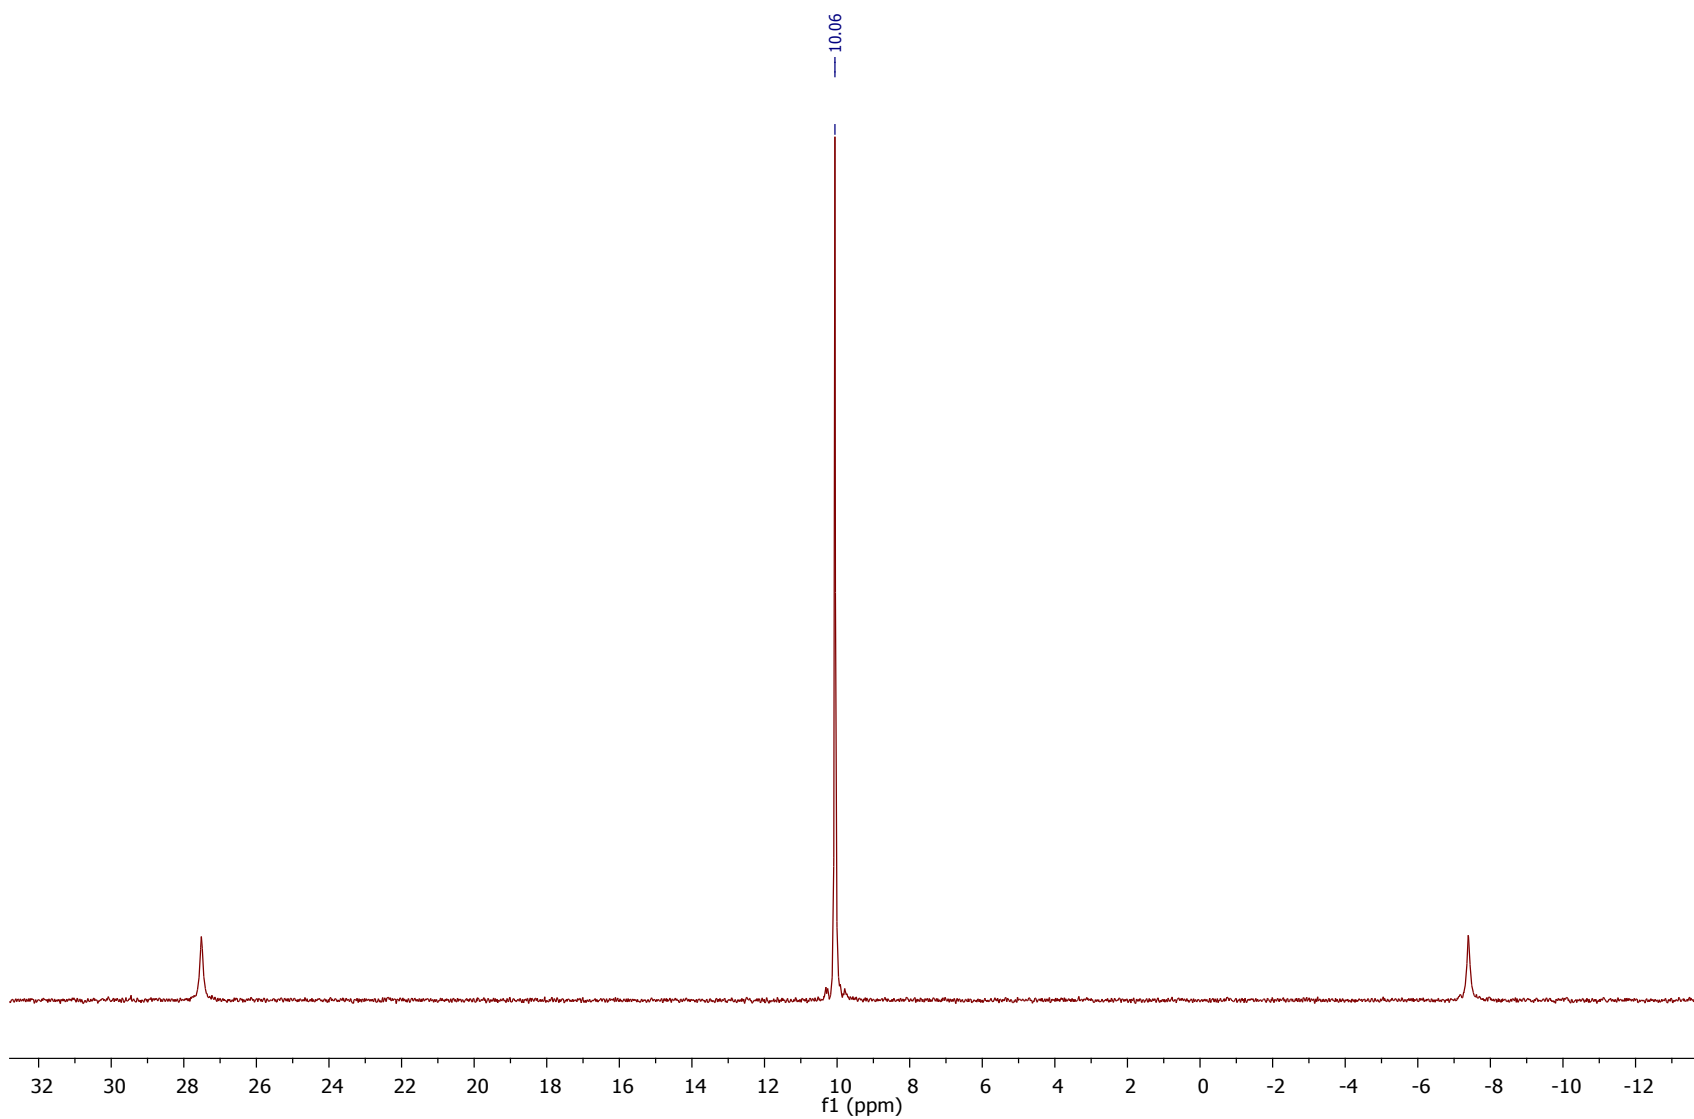

**Figure S7.**  $^{31}\text{P}$  NMR spectra of **2a**

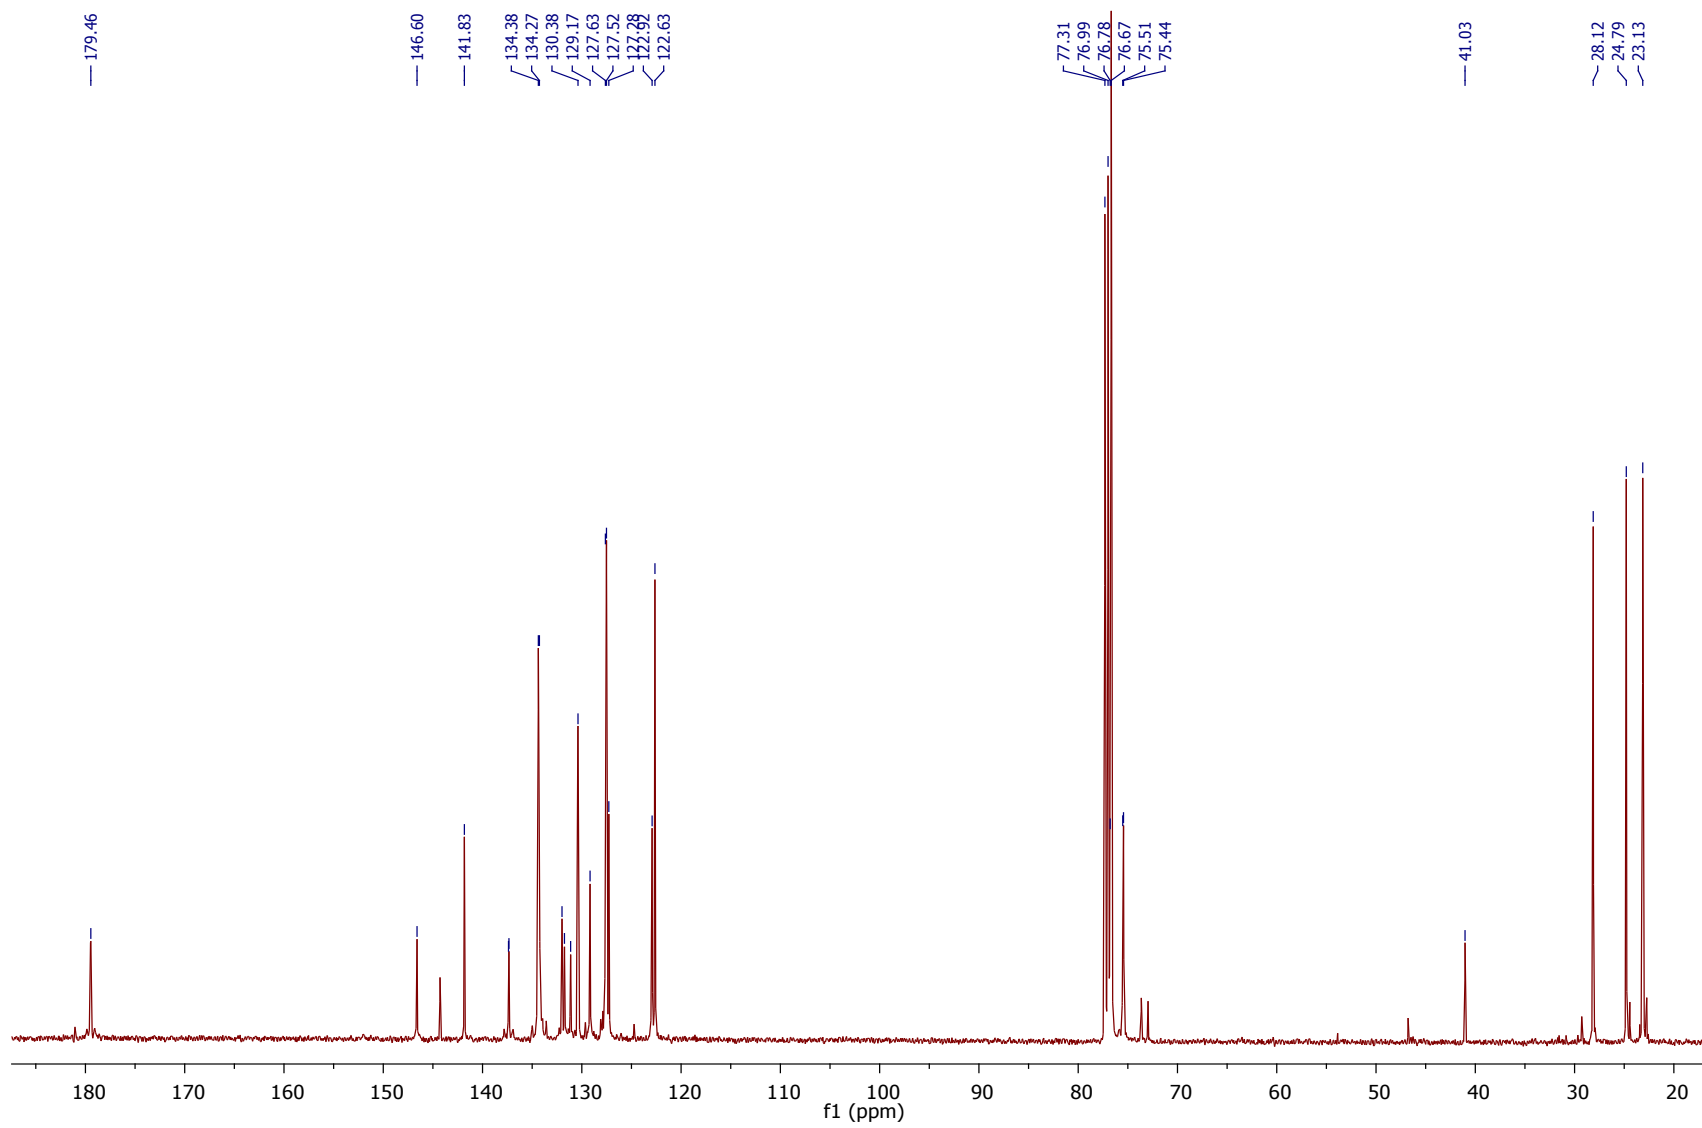

**Figure S8.**  $^{13}\text{C}$  NMR spectra of **2a**



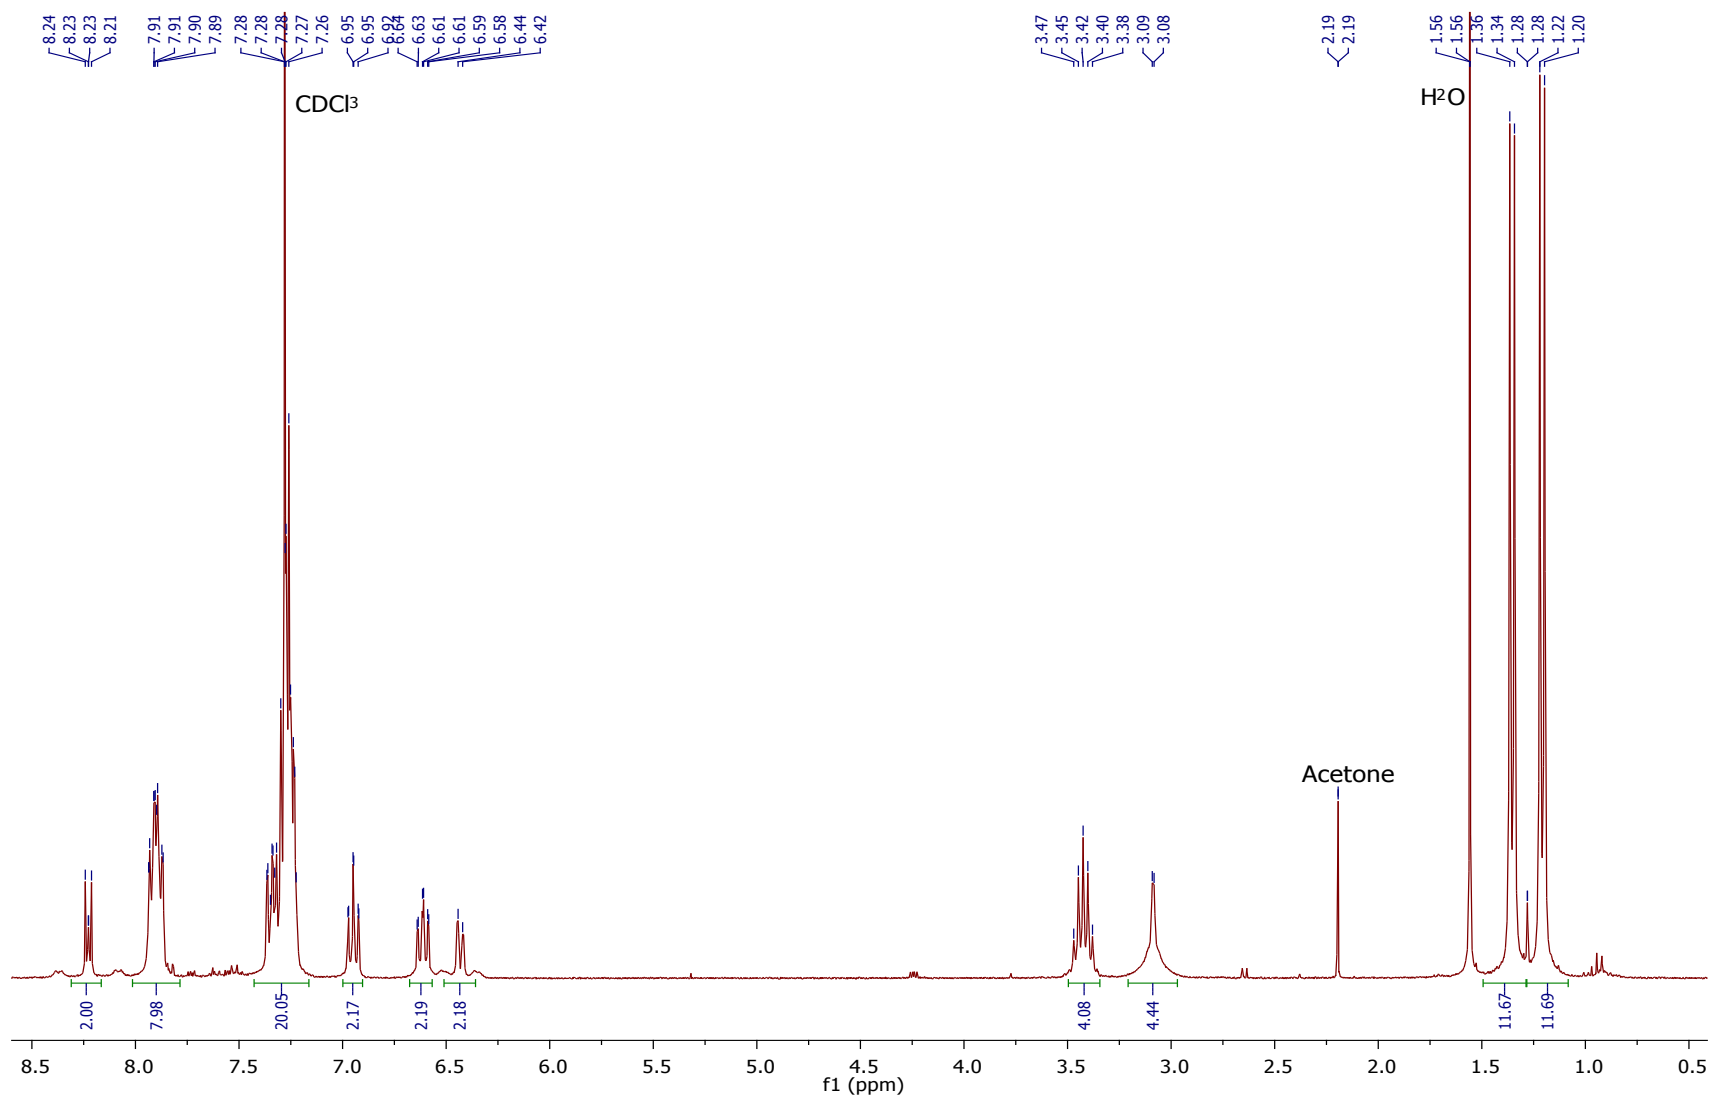

**Figure S9.** <sup>1</sup>H NMR spectra of **2b**

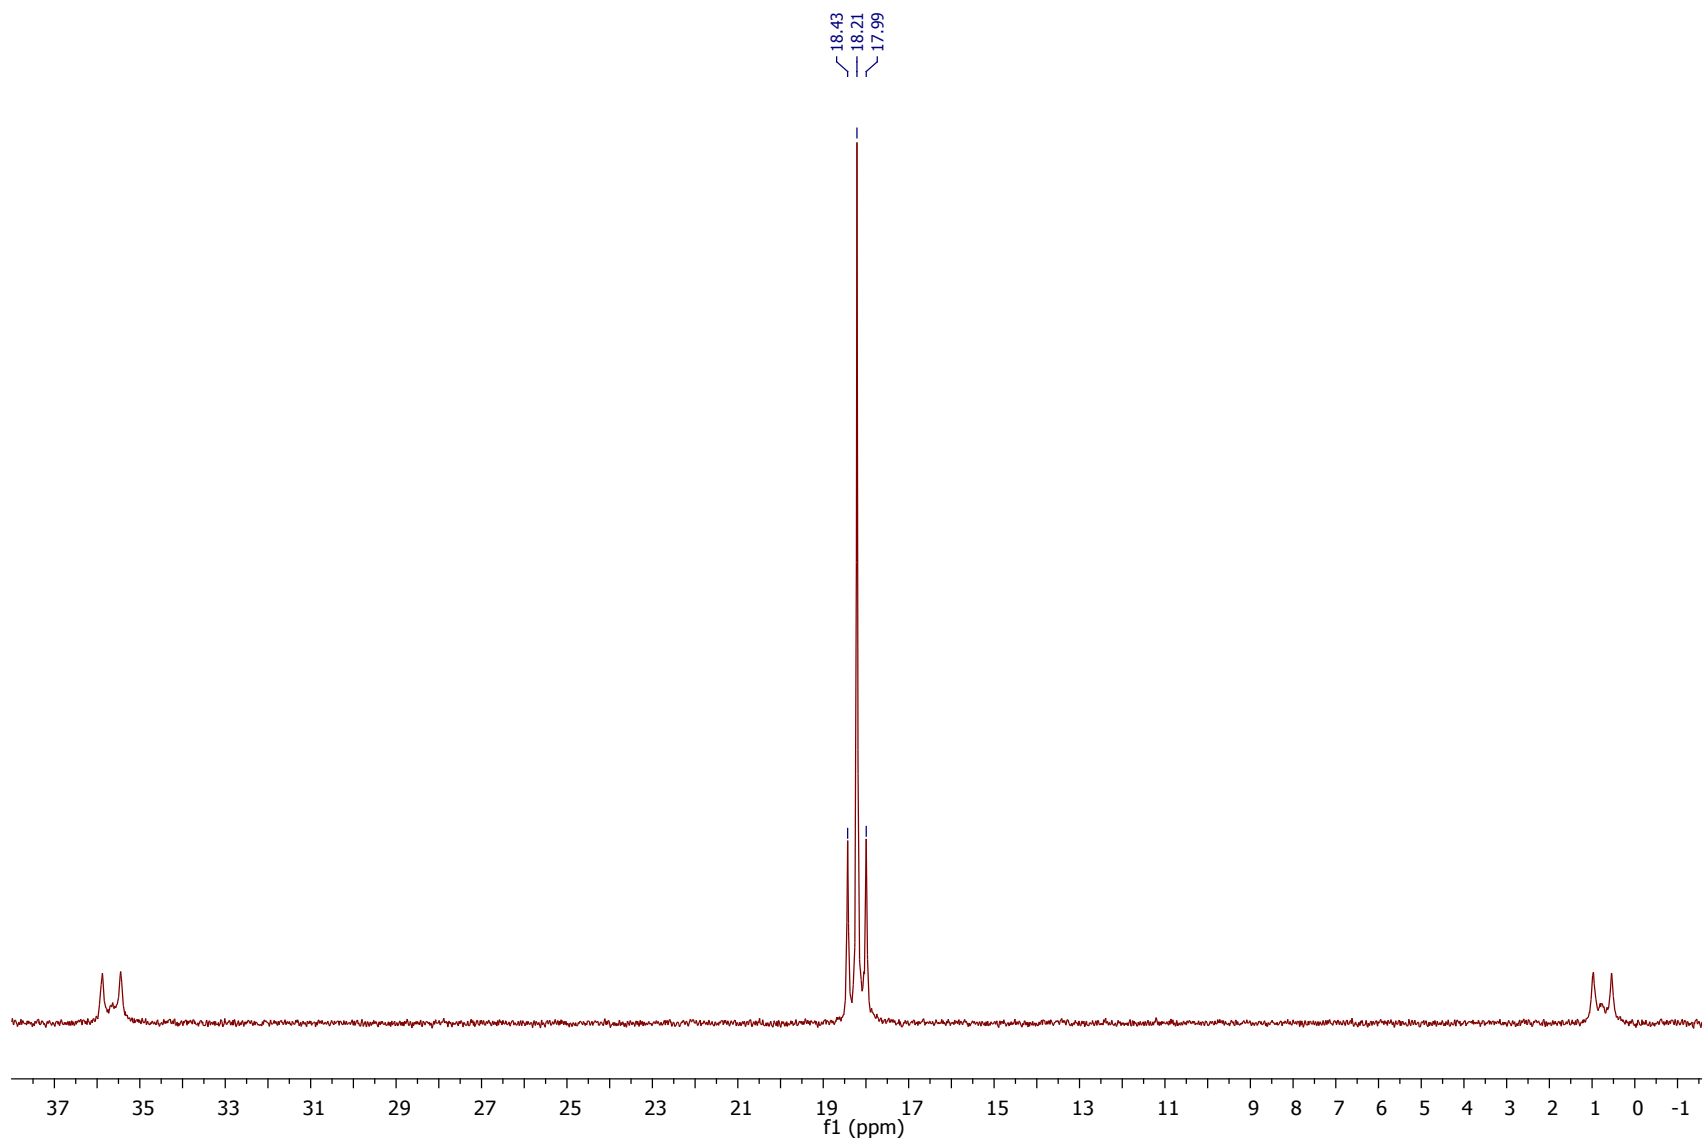

**Figure S10.**  $^{31}\text{P}$  NMR spectra of **2b**

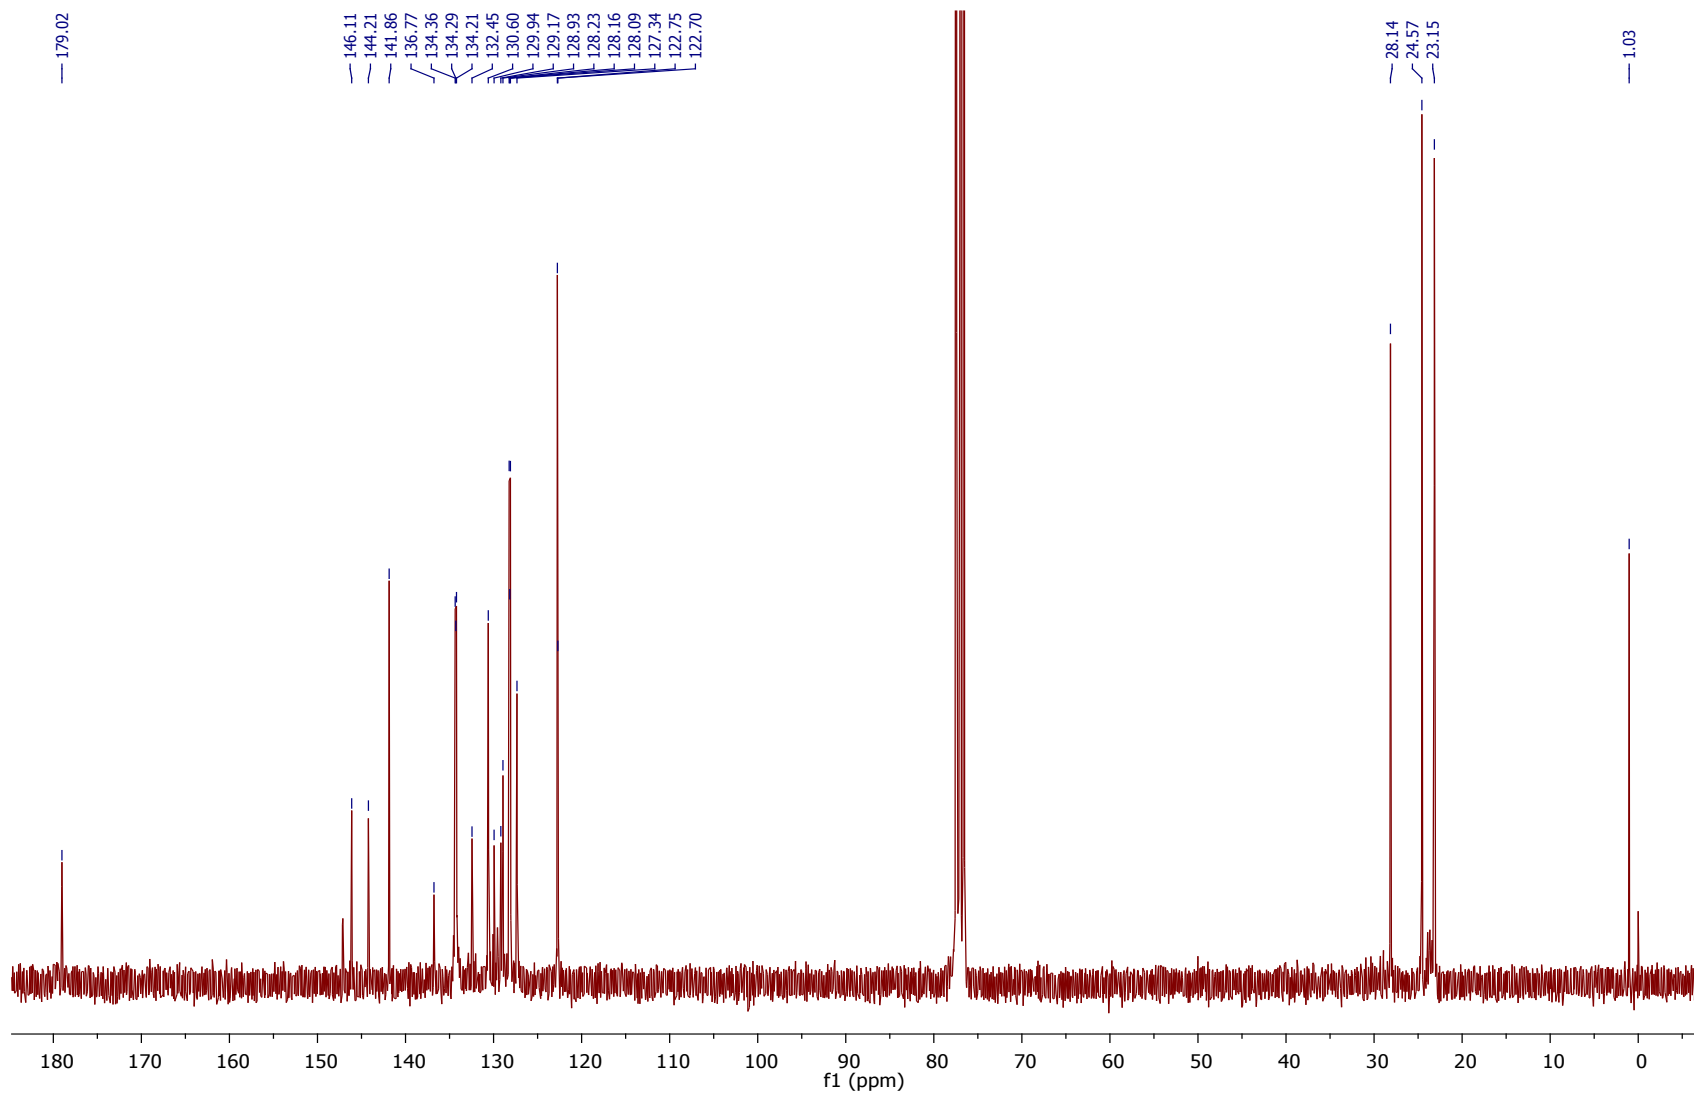

Figure S11.  $^{13}\text{C}$  NMR spectra of **2b**

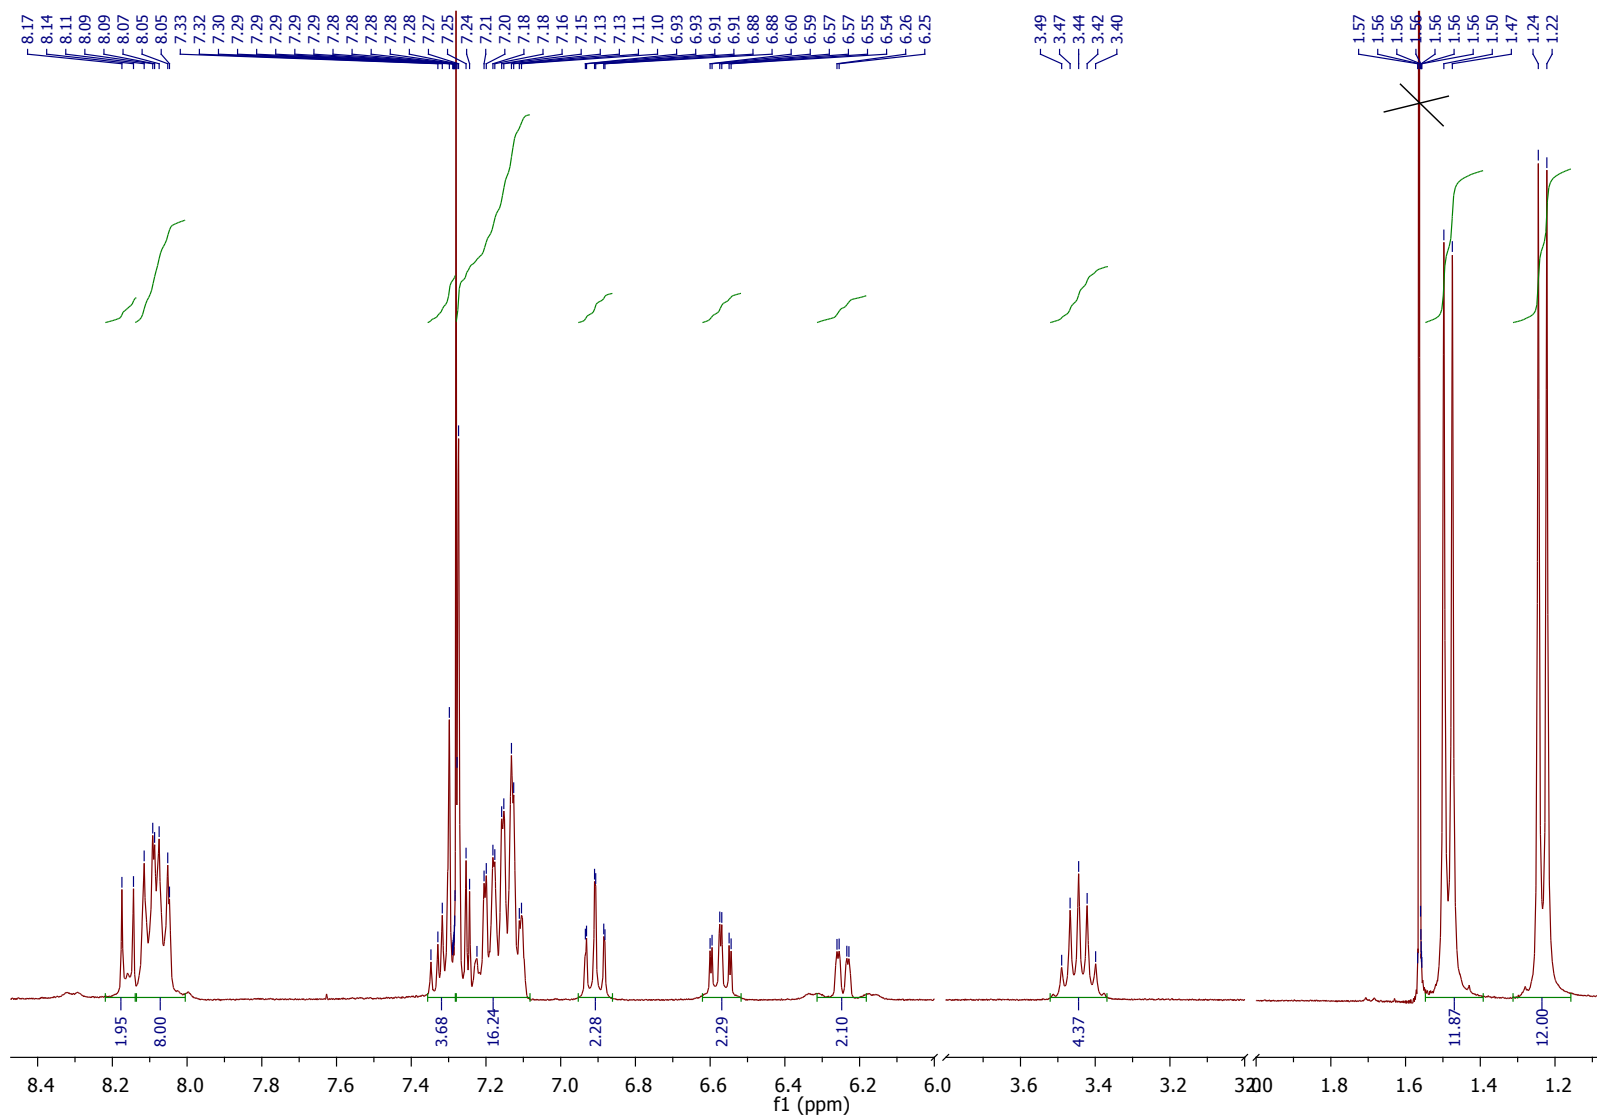

**Figure S12.**  $^1\text{H}$  NMR spectra of **2c**

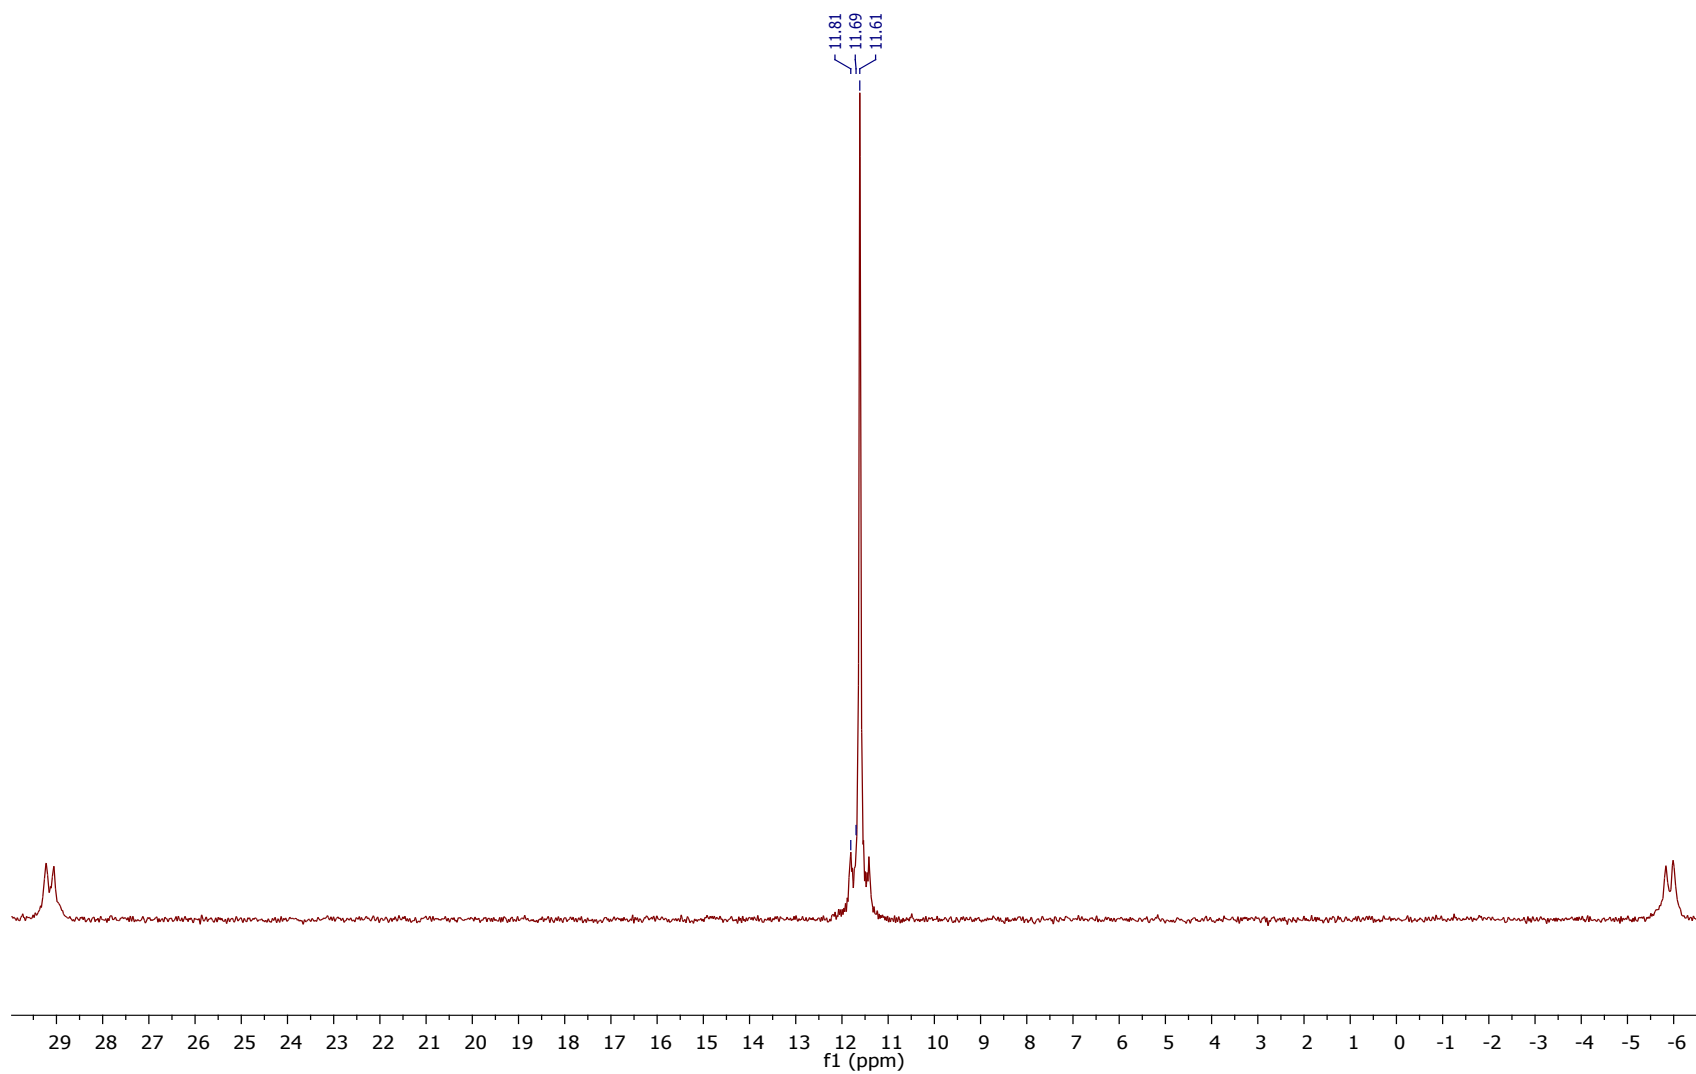

**Figure S13.**  $^{31}\text{P}$  NMR spectra of 2c

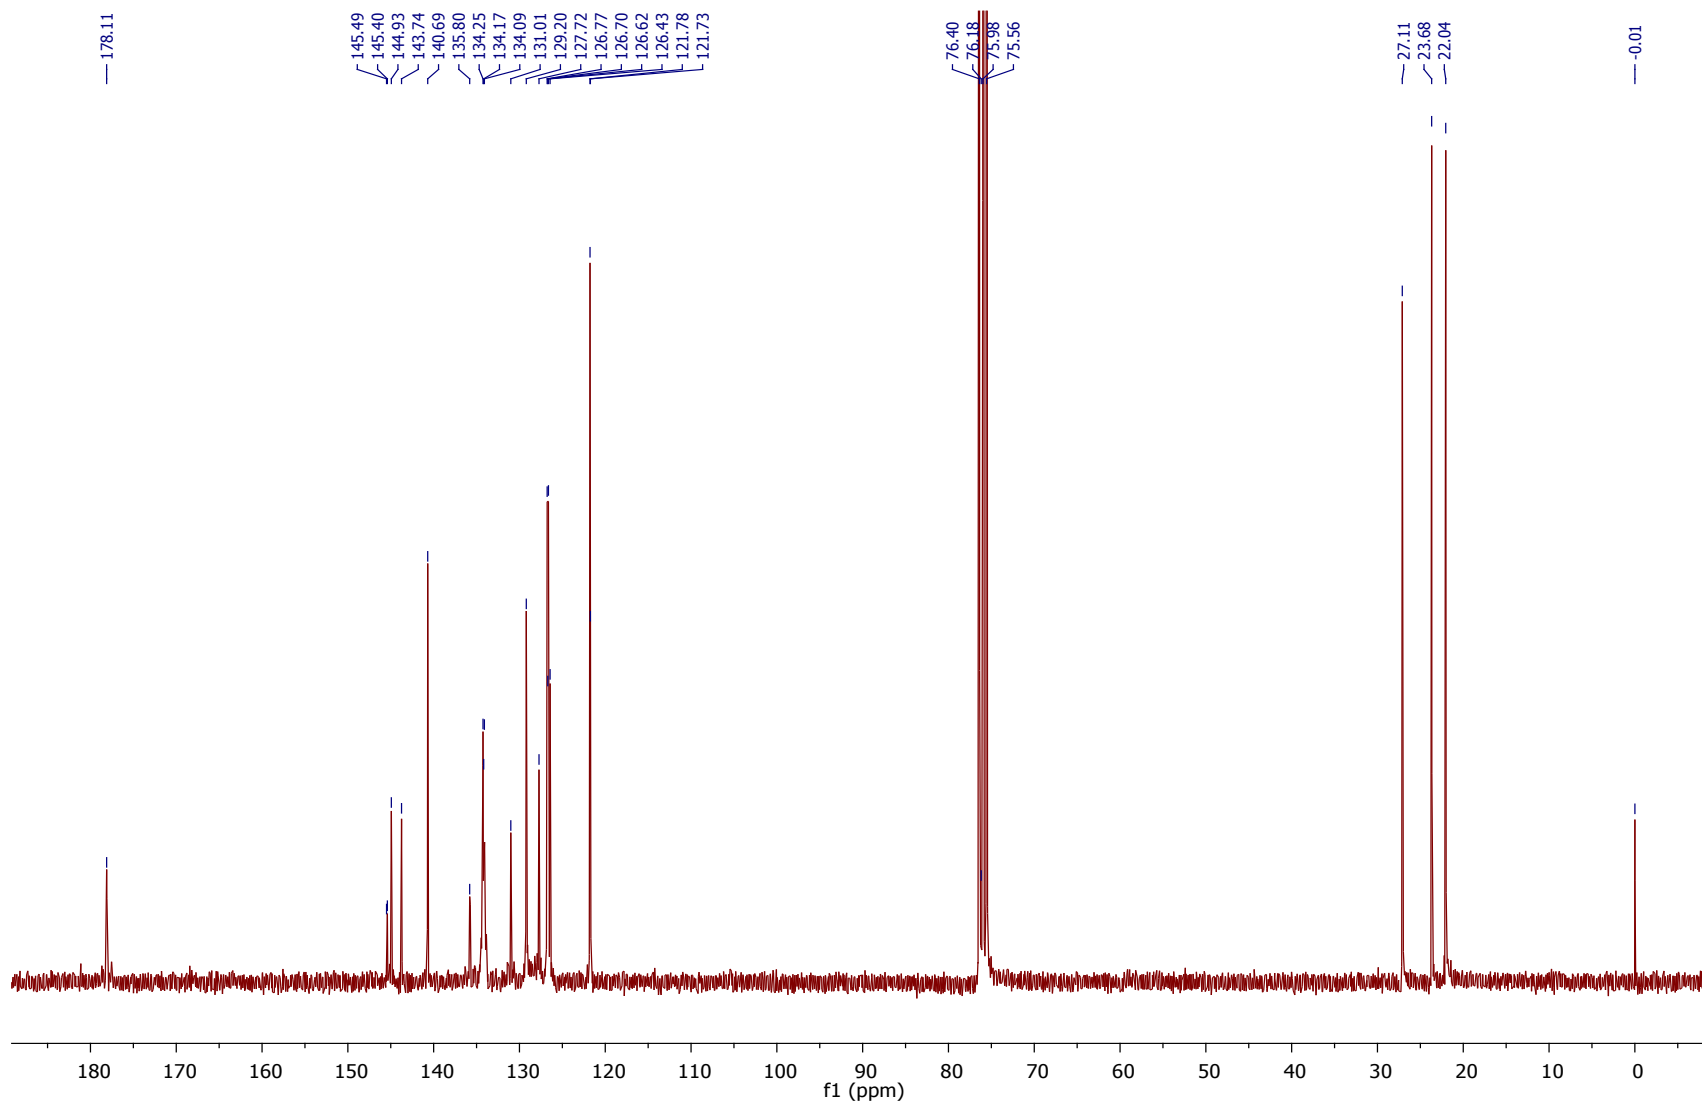

Figure S14.  $^{13}\text{C}$  NMR spectra of **2c**

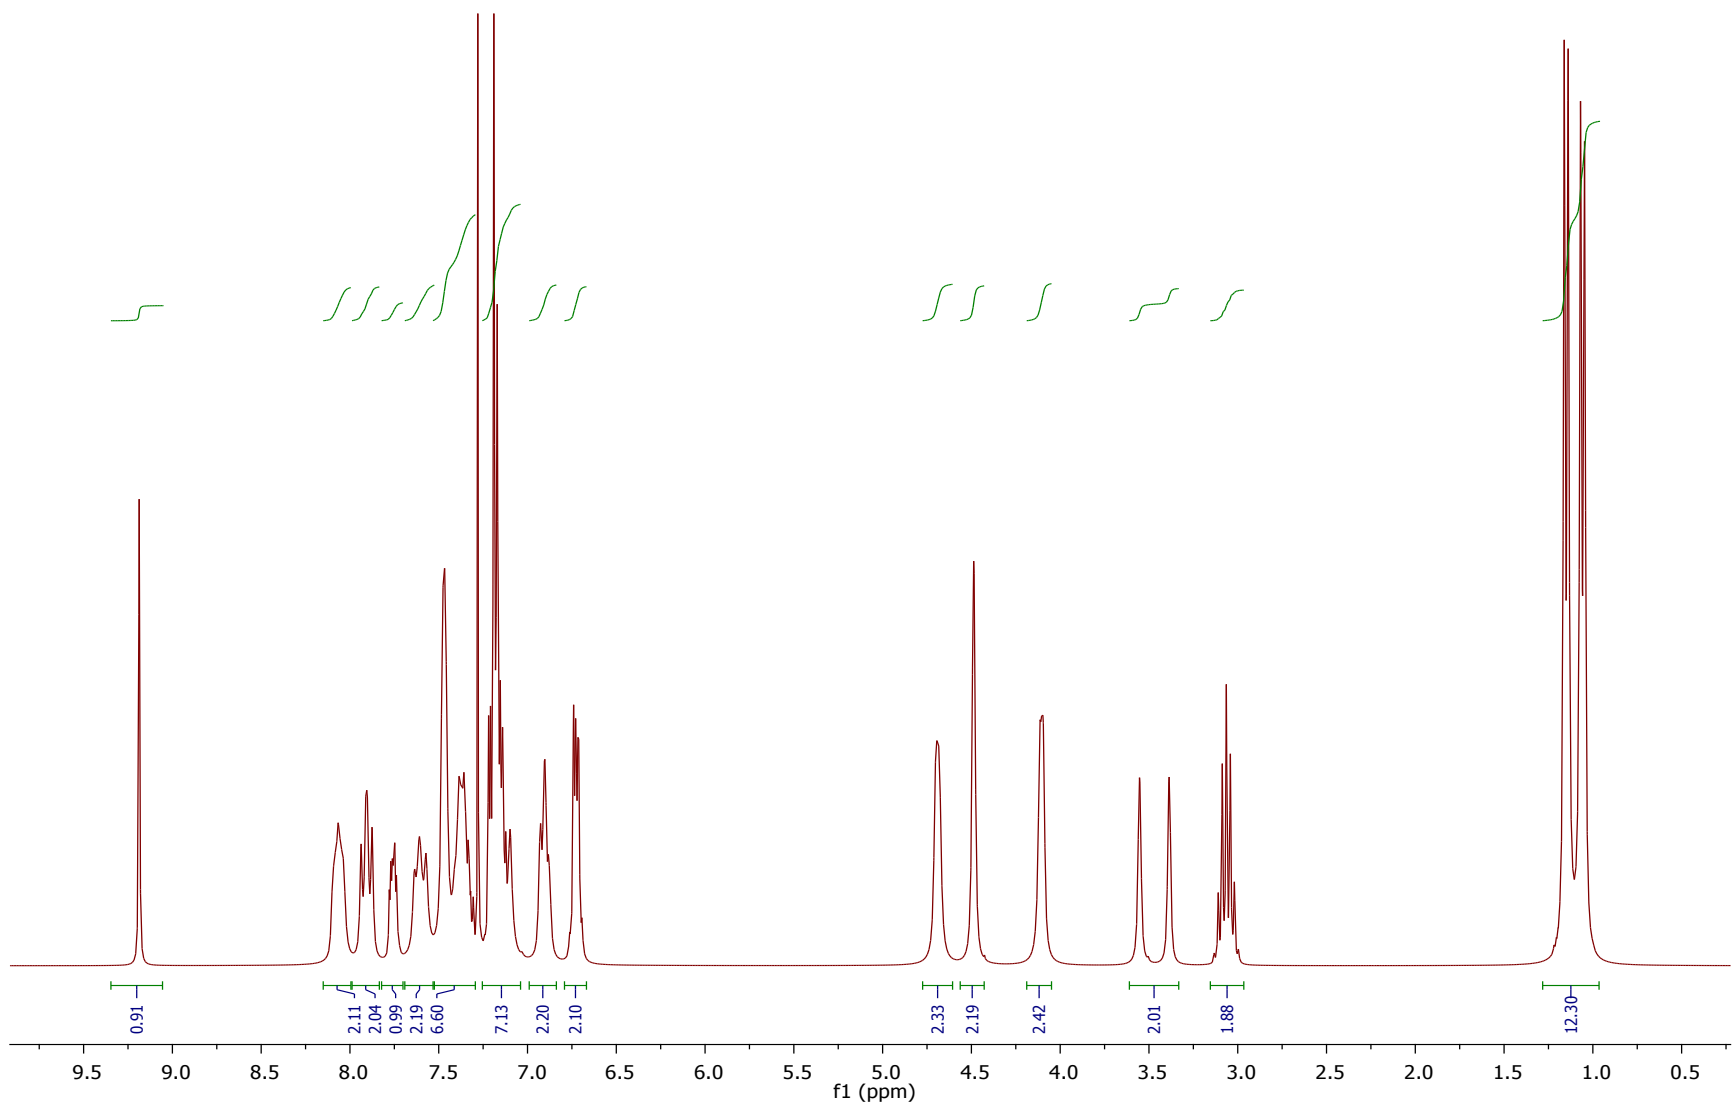

**Figure S15.** <sup>1</sup>H NMR spectra of **3a**

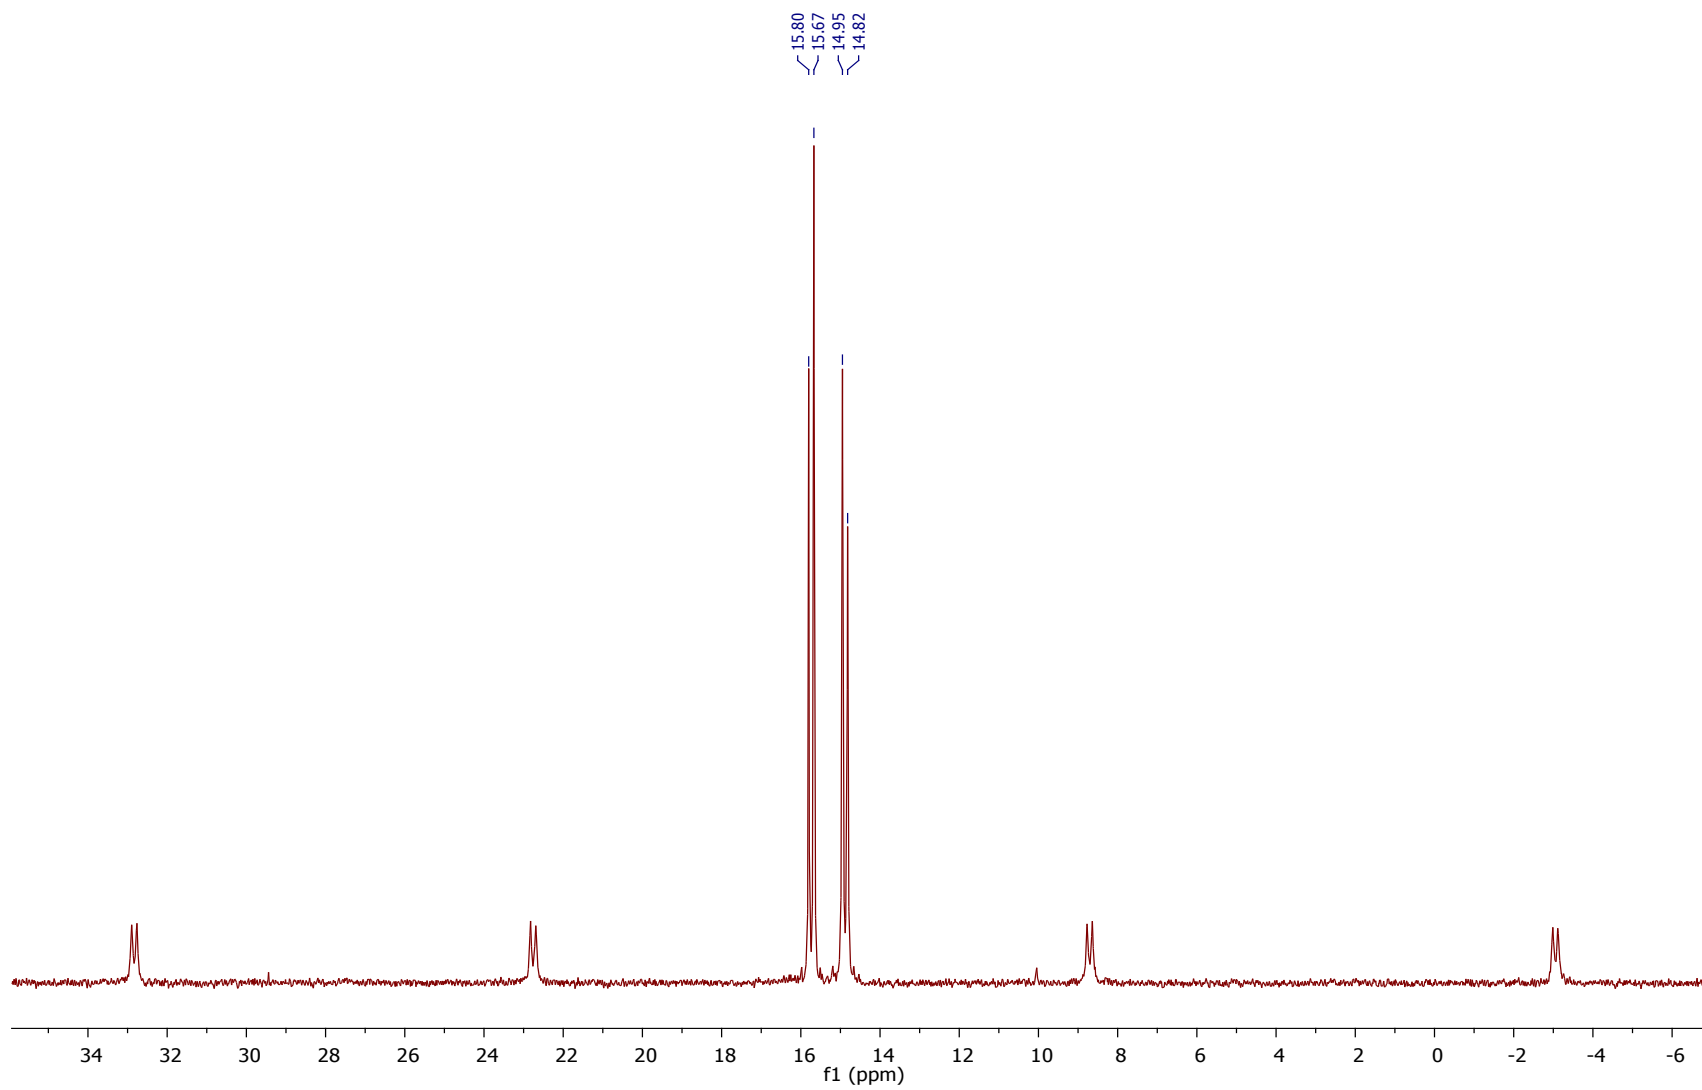

**Figure S16.**  $^{31}\text{P}$  NMR spectra of **3a**



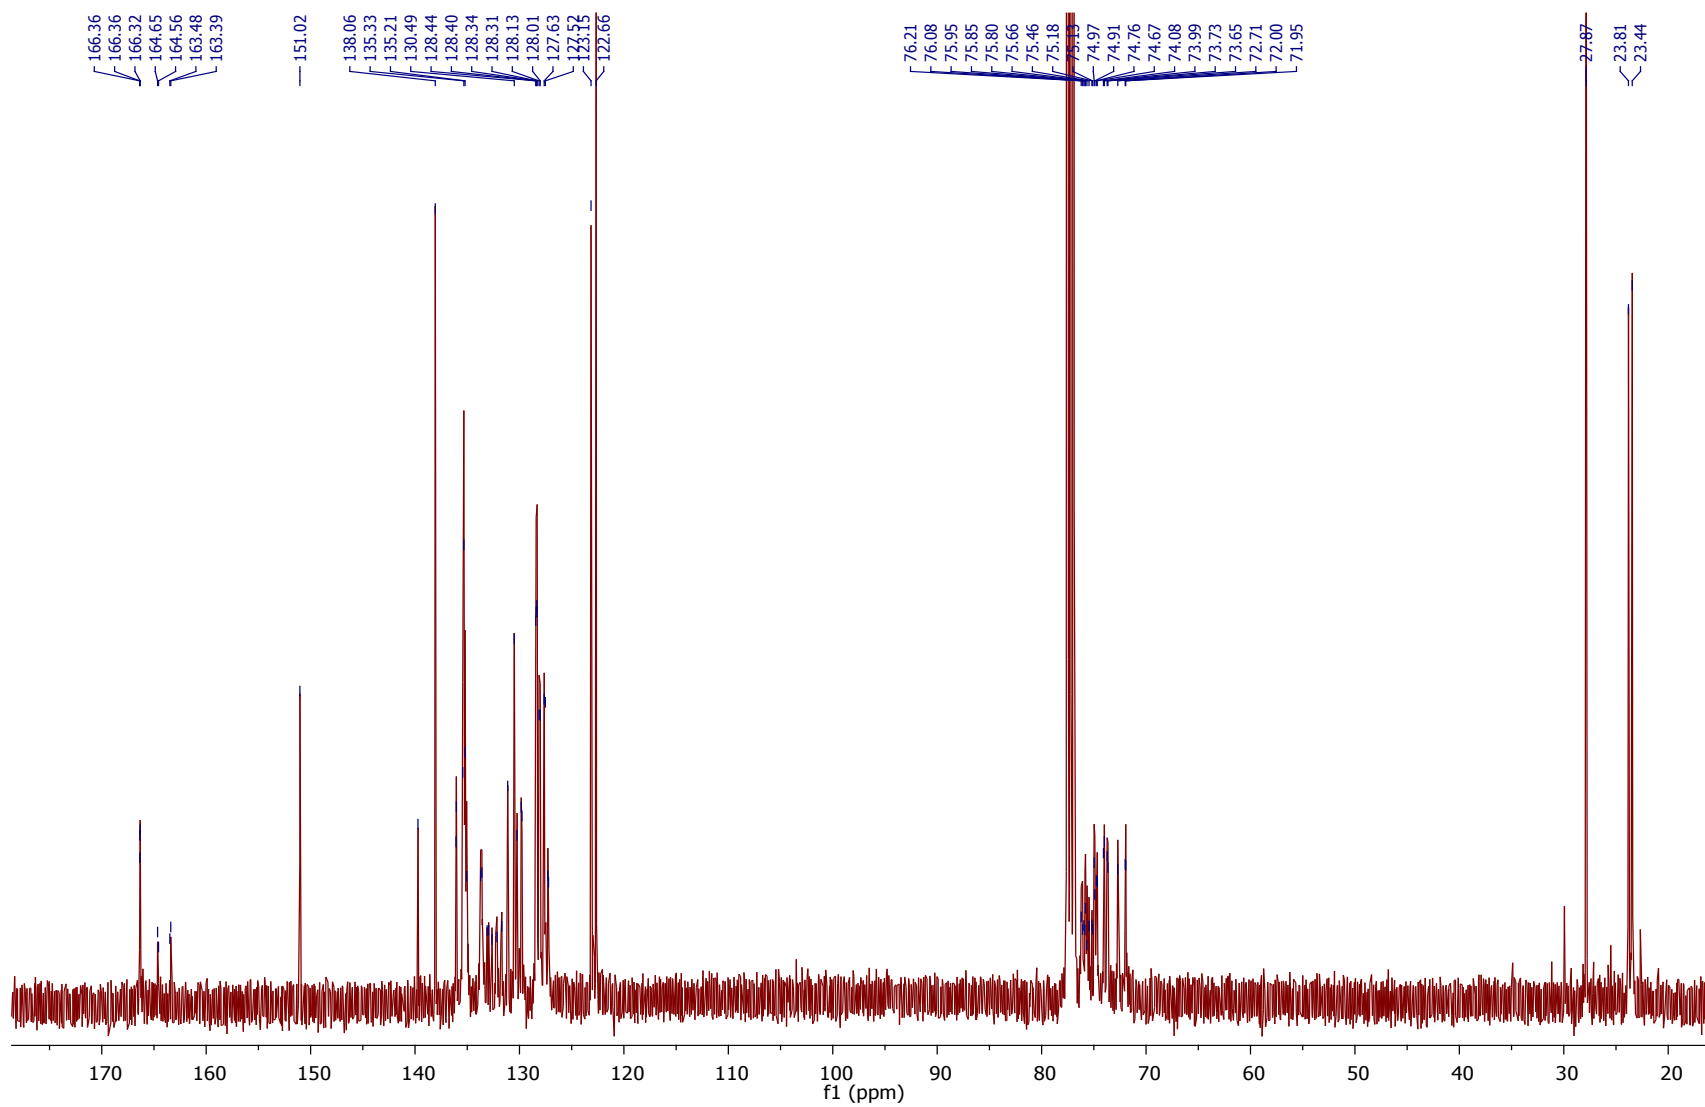

Figure S17. <sup>13</sup>C NMR spectra of **3a**

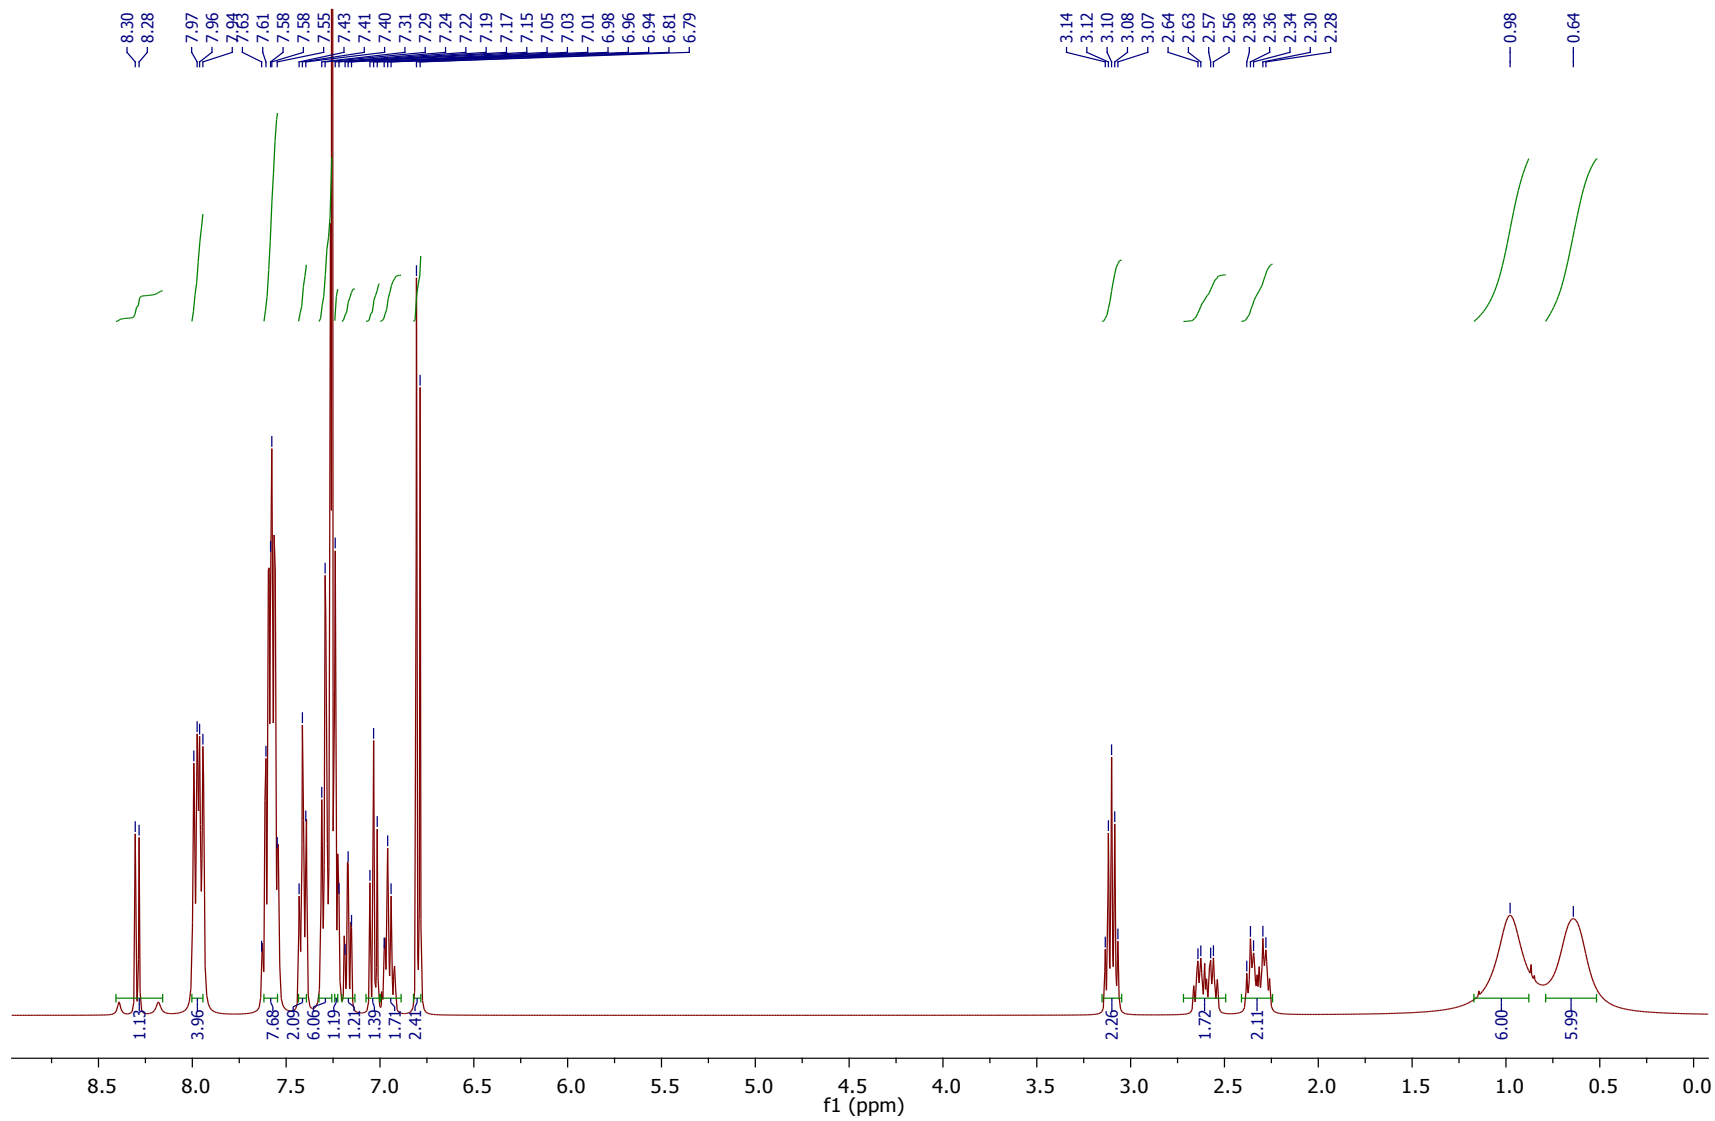

Figure S18. <sup>1</sup>H NMR spectra of **3b**

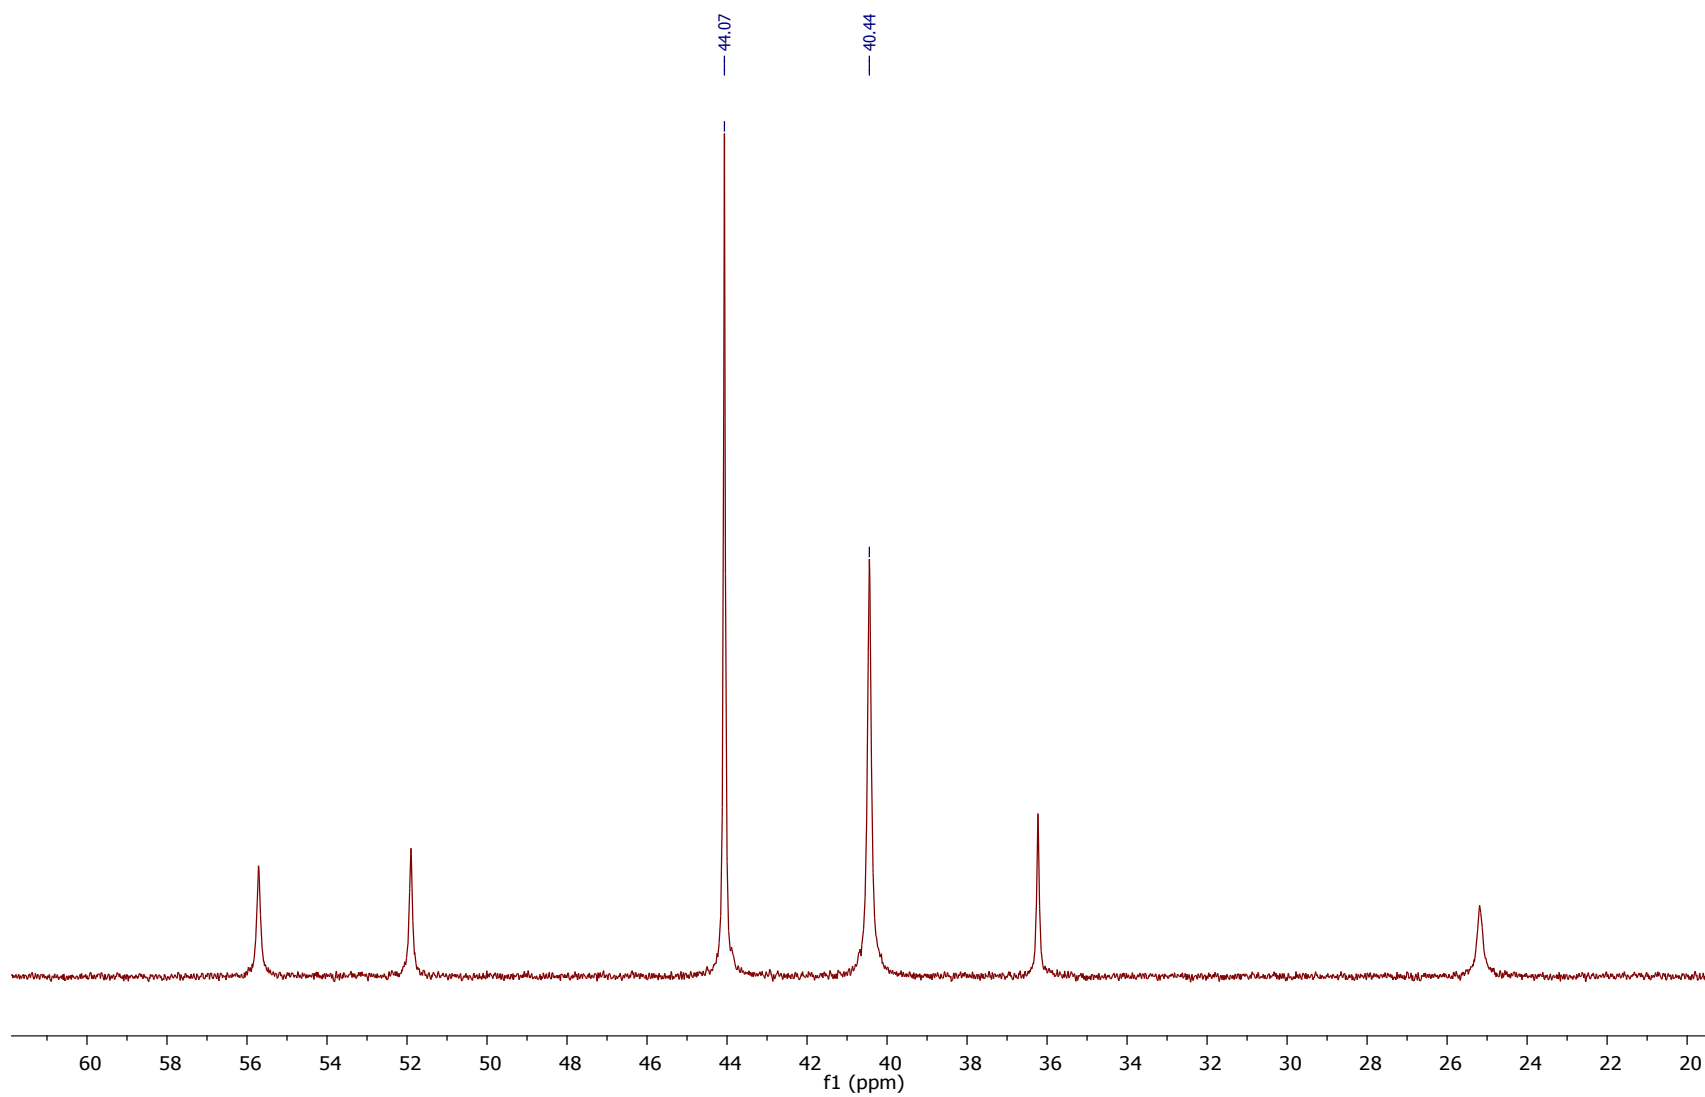

**Figure S19.**  $^{31}\text{P}$  NMR spectra of **3b**

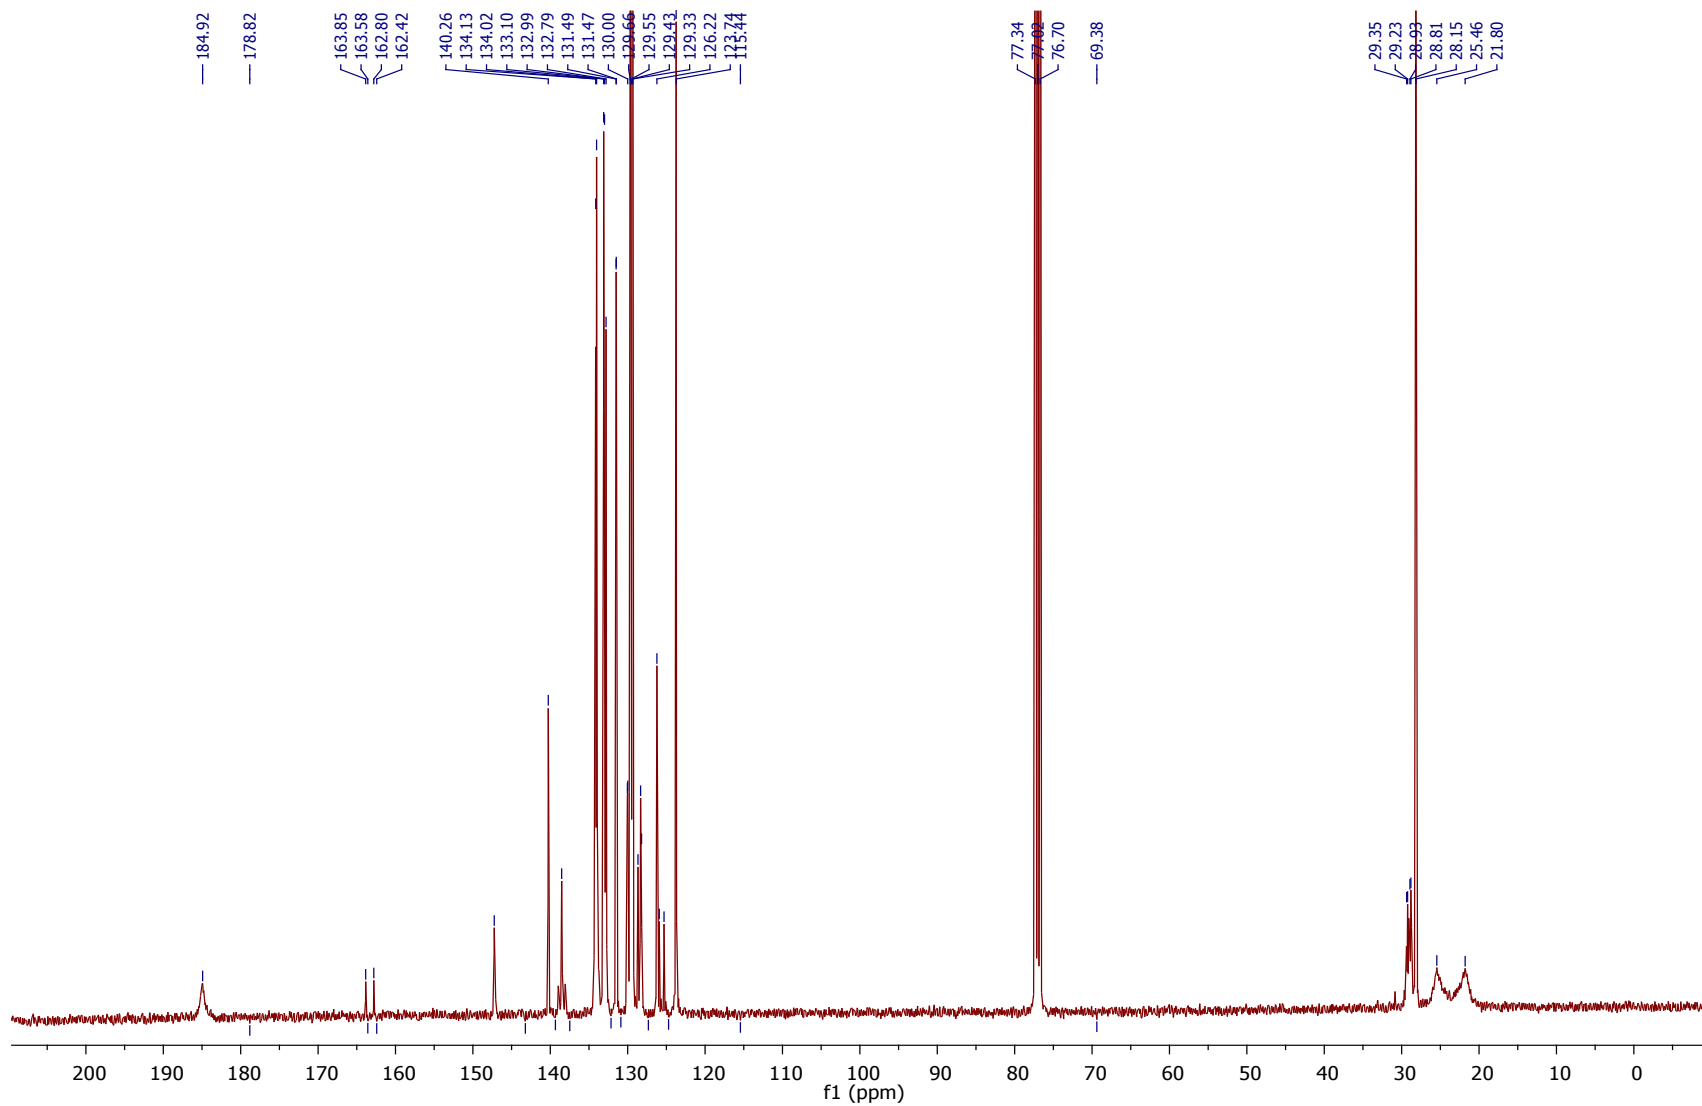

Figure S20.  $^{13}\text{C}$  NMR spectra of **3b**

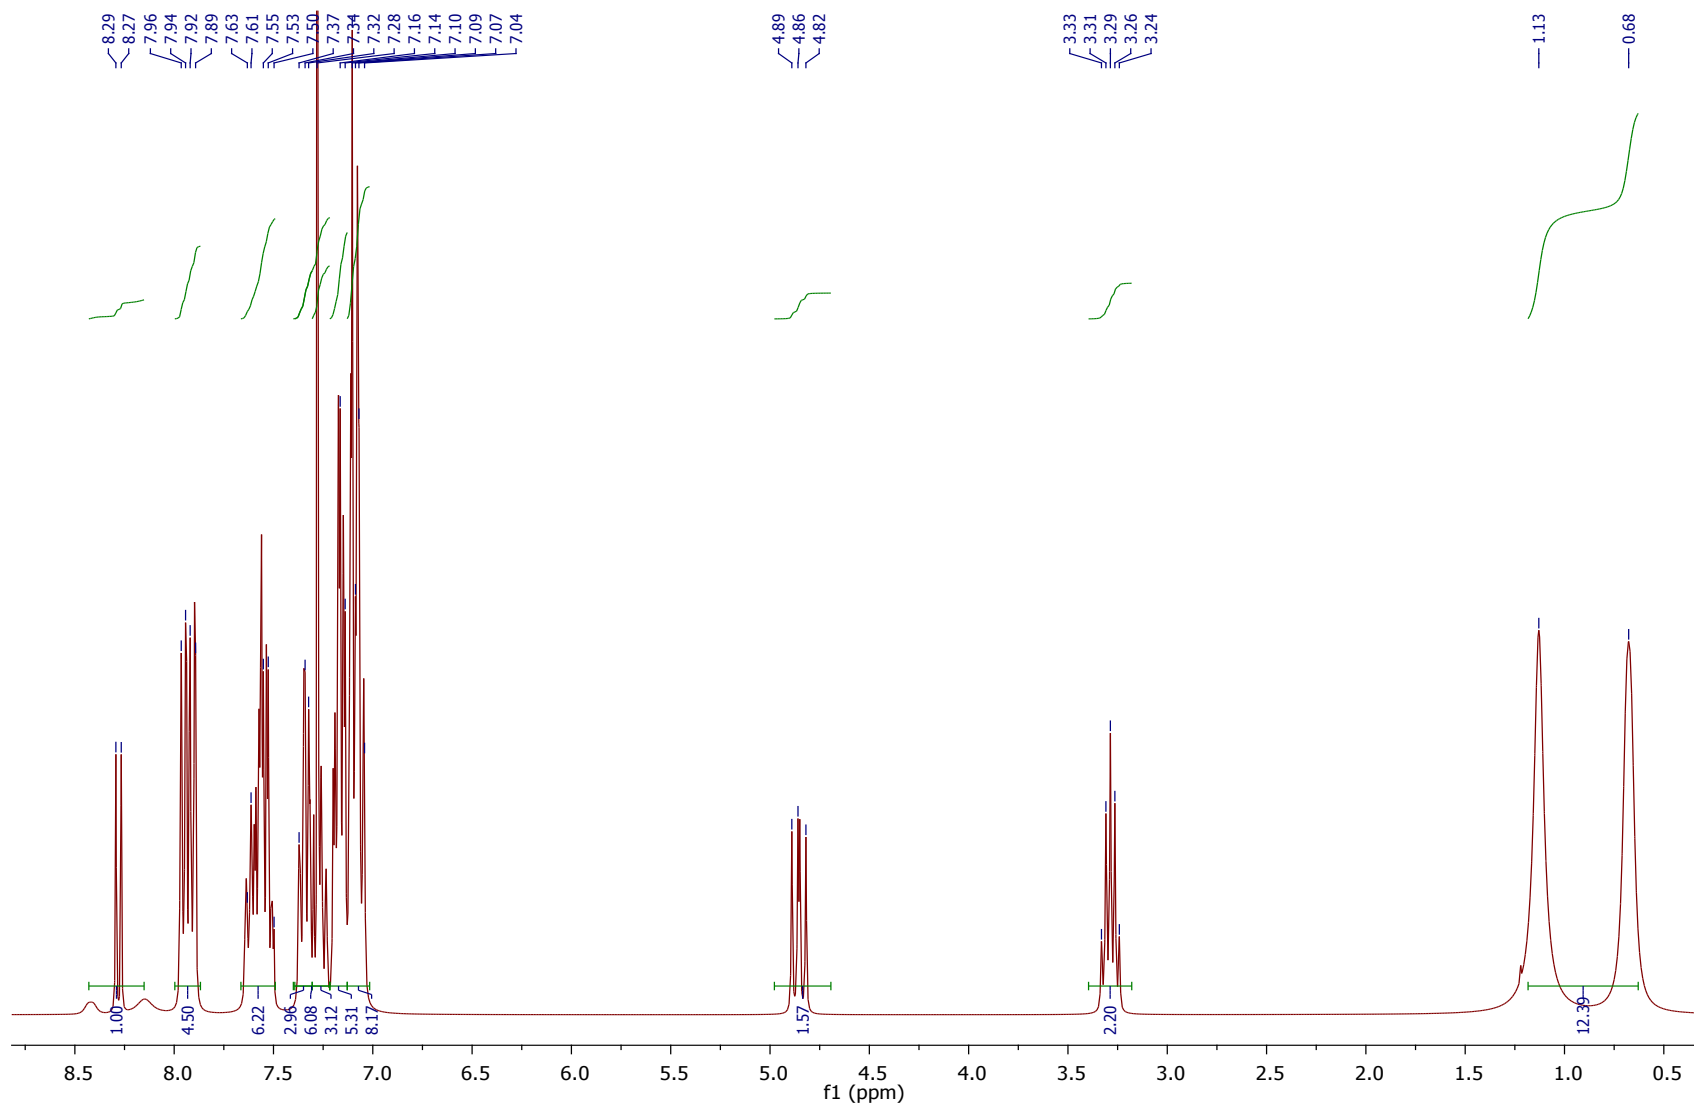

Figure S21. <sup>1</sup>H NMR spectra of 3c

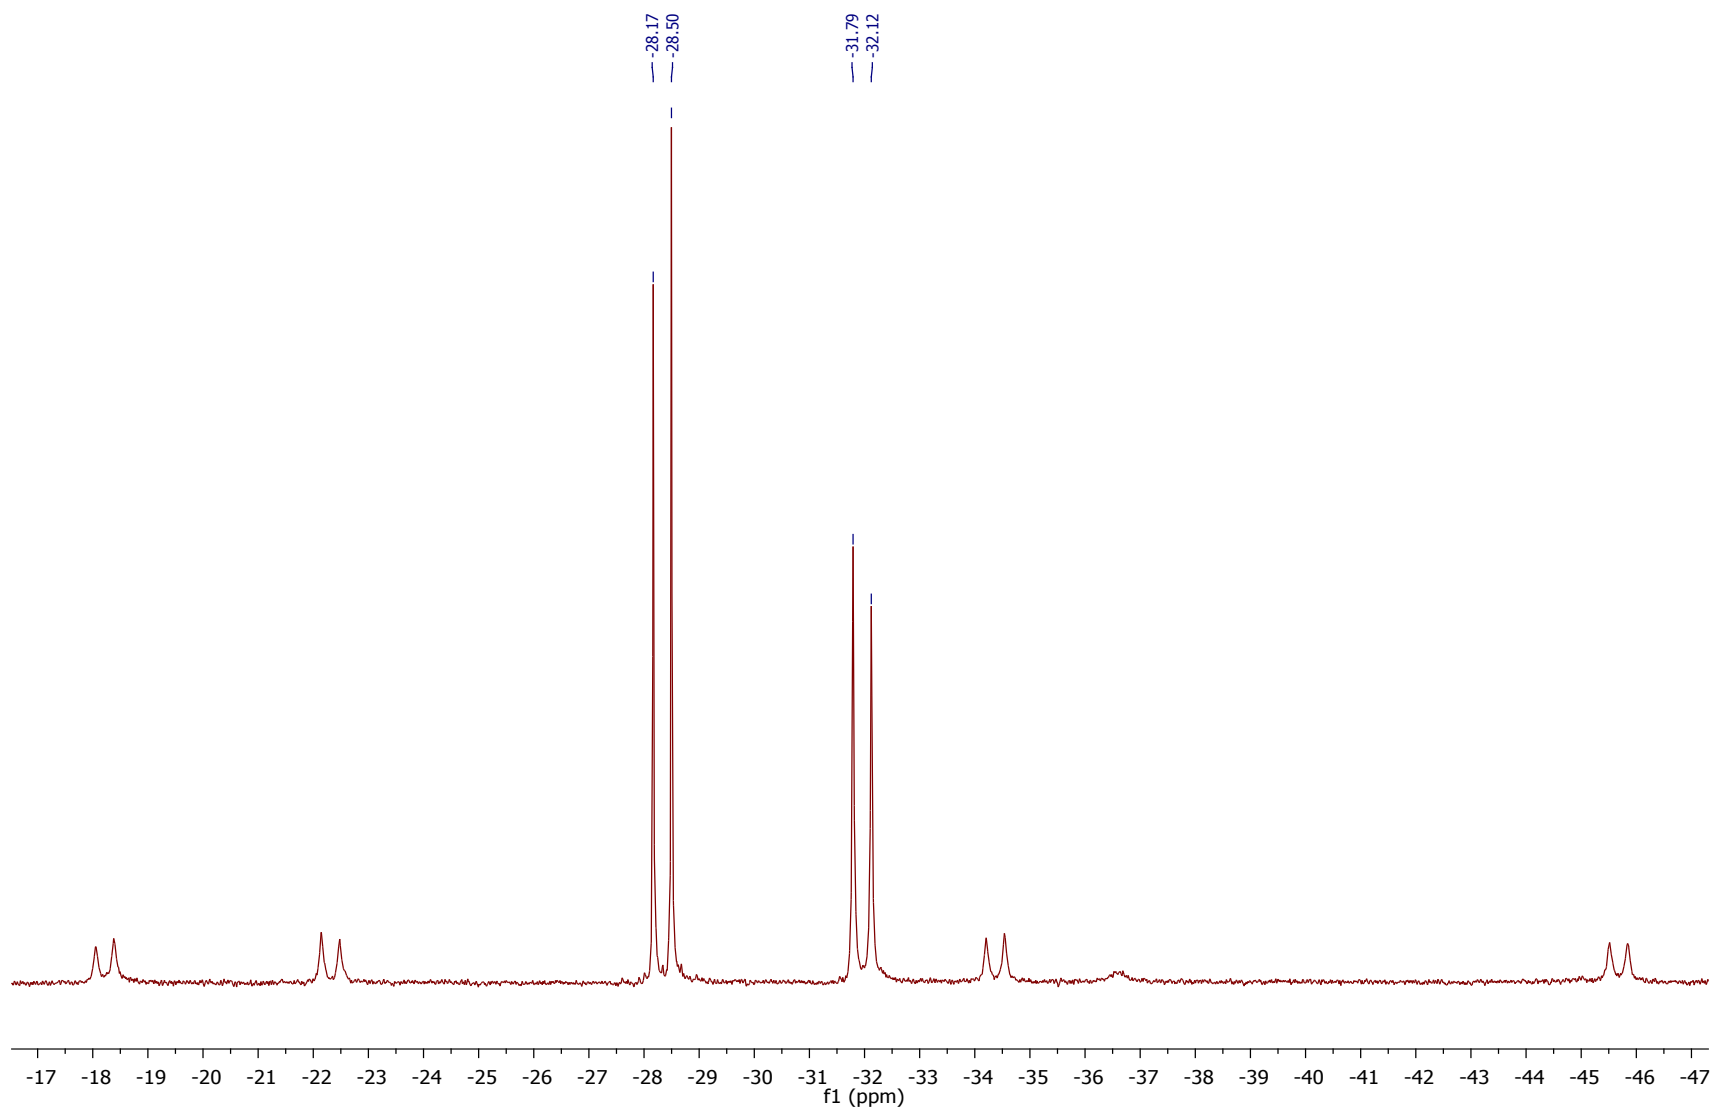

**Figure S22.**  $^{31}\text{P}$  NMR spectra of **3c**

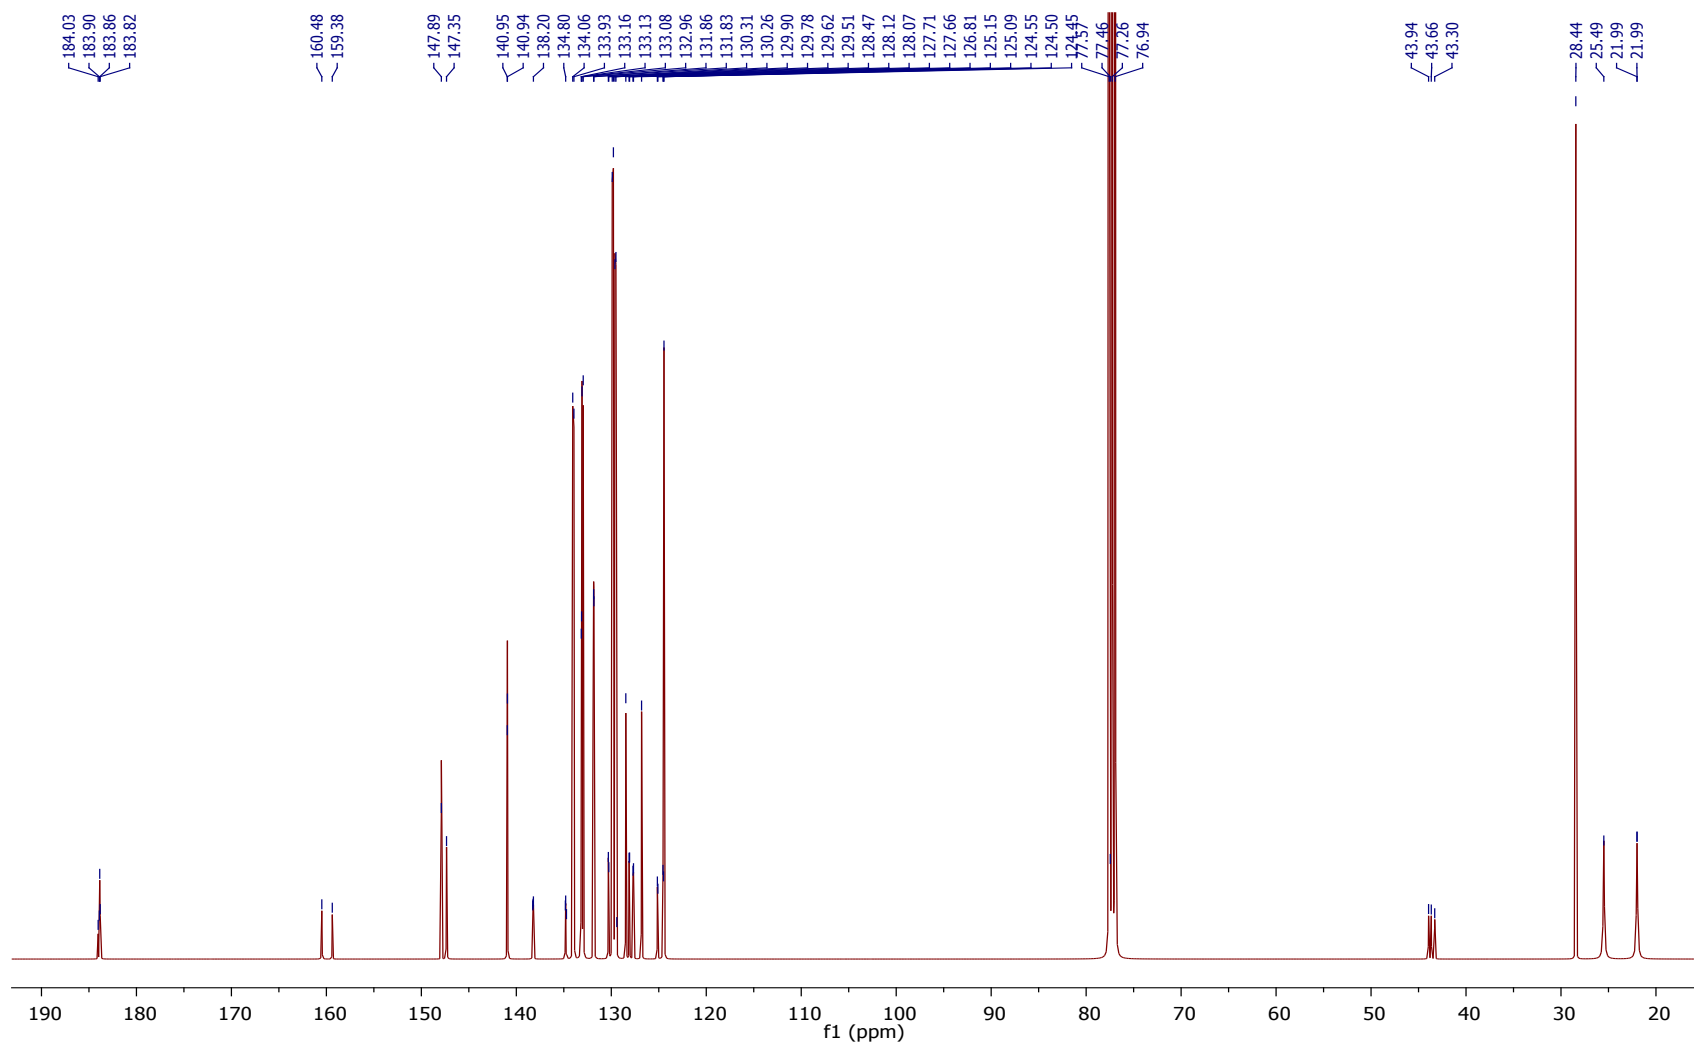

Figure S23.  $^{13}\text{C}$  NMR spectra of **3c**

**Table S7.** Cartesian Coordinates (in Å) of optimized structures.

**3aN-1**

|    |          |          |          |
|----|----------|----------|----------|
| Pt | -16.8489 | 16.97936 | 2.55736  |
| Fe | -14.4333 | 17.59301 | -1.0453  |
| P  | -17.606  | 17.49564 | 0.34193  |
| P  | -14.6384 | 15.88912 | 1.92454  |
| Cl | -16.2936 | 16.52069 | 4.92884  |
| C  | -18.6926 | 17.74211 | 3.31858  |
| C  | -13.2768 | 17.77966 | 3.47     |
| H  | -14.1241 | 18.42553 | 3.24072  |
| C  | -16.0933 | 18.27139 | -2.0625  |
| H  | -16.6493 | 17.68264 | -2.78378 |
| C  | -19.0297 | 18.6355  | 0.11238  |
| C  | -17.9374 | 14.73277 | -0.02195 |
| H  | -17.5085 | 14.65042 | 0.97791  |
| C  | -15.3116 | 19.17174 | -0.06588 |
| H  | -15.1958 | 19.39162 | 0.99095  |
| N  | -17.7229 | 21.13034 | 4.39279  |
| C  | -12.541  | 16.83825 | -1.47585 |
| H  | -11.7647 | 17.35871 | -2.0286  |
| C  | -18.8254 | 19.97913 | -0.23553 |
| H  | -17.8171 | 20.35173 | -0.41079 |
| C  | -19.7781 | 16.85972 | 3.39835  |
| H  | -19.6828 | 15.83809 | 3.02681  |
| C  | -18.8362 | 19.04826 | 3.83337  |
| C  | -20.9969 | 17.26484 | 3.95207  |



|   |          |          |          |
|---|----------|----------|----------|
| H | -21.8291 | 16.56045 | 4.00002  |
| C | -16.5773 | 21.95545 | 4.38304  |
| C | -16.2569 | 22.73671 | 3.24071  |
| C | -21.1479 | 18.57003 | 4.43867  |
| H | -22.0984 | 18.89264 | 4.86511  |
| C | -19.9144 | 20.84426 | -0.37956 |
| H | -19.742  | 21.8845  | -0.65669 |
| C | -17.1621 | 22.73244 | 2.01612  |
| H | -17.5506 | 21.71291 | 1.88755  |
| C | -17.696  | 19.96977 | 3.84213  |
| H | -16.7799 | 19.57936 | 3.36296  |
| C | -14.5036 | 19.67496 | -1.12857 |
| H | -13.6445 | 20.32905 | -1.01442 |
| C | -16.3078 | 18.29274 | -0.63658 |
| C | -21.4239 | 19.03811 | 0.17039  |
| H | -22.4356 | 18.66476 | 0.33052  |
| C | -13.5525 | 15.99461 | -2.03436 |
| H | -13.685  | 15.7641  | -3.08729 |
| C | -14.3921 | 15.5413  | -0.97075 |
| H | -15.2654 | 14.90583 | -1.07823 |
| C | -13.8955 | 16.09726 | 0.26575  |
| C | -21.2147 | 20.37677 | -0.17604 |
| H | -22.0629 | 21.05192 | -0.29115 |
| C | -12.7438 | 16.90249 | -0.06385 |
| H | -12.1498 | 17.47449 | 0.64148  |
| C | -20.34   | 18.1712  | 0.31541  |
| H | -20.5192 | 17.13082 | 0.58259  |

|   |          |          |          |
|---|----------|----------|----------|
| C | -15.8192 | 22.06523 | 5.57601  |
| C | -18.1273 | 16.00086 | -0.59079 |
| C | -19.0783 | 14.94632 | -2.56151 |
| H | -19.5329 | 15.03499 | -3.54834 |
| C | -18.8661 | 13.68442 | -1.99568 |
| H | -19.1502 | 12.78607 | -2.54397 |
| C | -14.9829 | 19.12016 | -2.3556  |
| H | -14.5469 | 19.27518 | -3.33845 |
| C | -18.3006 | 13.57932 | -0.72288 |
| H | -18.1469 | 12.60125 | -0.26638 |
| C | -18.7206 | 16.09976 | -1.86129 |
| H | -18.9166 | 17.07647 | -2.30352 |
| C | -13.2637 | 16.4557  | 3.00658  |
| C | -14.6877 | 14.05868 | 2.12358  |
| C | -20.0722 | 19.44889 | 4.38407  |
| H | -20.158  | 20.46431 | 4.77262  |
| C | -12.196  | 15.6163  | 3.35563  |
| H | -12.1797 | 14.5791  | 3.02201  |
| C | -15.5625 | 13.51776 | 3.08146  |
| H | -16.1653 | 14.18512 | 3.69905  |
| C | -11.1625 | 17.42589 | 4.59501  |
| H | -10.3484 | 17.79842 | 5.2174   |
| C | -12.2268 | 18.26496 | 4.2535   |
| H | -12.2527 | 19.29535 | 4.6081   |
| C | -15.14   | 23.58024 | 3.30926  |
| H | -14.8741 | 24.18354 | 2.44168  |
| C | -13.9847 | 11.8094  | 1.52845  |

|   |          |          |          |
|---|----------|----------|----------|
| H | -13.3671 | 11.14764 | 0.92101  |
| C | -14.7083 | 22.91745 | 5.58718  |
| H | -14.1073 | 22.99844 | 6.49333  |
| C | -11.1526 | 16.1003  | 4.14993  |
| H | -10.333  | 15.43622 | 4.42574  |
| C | -16.1952 | 21.24625 | 6.80101  |
| H | -17.2504 | 20.95933 | 6.67495  |
| C | -13.8979 | 13.19304 | 1.34851  |
| H | -13.2164 | 13.59458 | 0.59953  |
| C | -14.3605 | 23.66703 | 4.46367  |
| H | -13.4918 | 24.32654 | 4.48906  |
| C | -15.6439 | 12.13434 | 3.25819  |
| H | -16.3266 | 11.72691 | 4.00431  |
| C | -14.8593 | 11.27814 | 2.48033  |
| H | -14.9282 | 10.19837 | 2.61583  |
| C | -16.0854 | 22.04148 | 8.11037  |
| H | -16.4675 | 21.43855 | 8.94655  |
| H | -16.6682 | 22.97193 | 8.06313  |
| H | -15.044  | 22.30348 | 8.34576  |
| C | -15.3709 | 19.9487  | 6.87553  |
| H | -14.297  | 20.17674 | 6.95187  |
| H | -15.526  | 19.31622 | 5.99202  |
| H | -15.6574 | 19.36174 | 7.76036  |
| C | -16.4531 | 23.11621 | 0.71167  |
| H | -17.139  | 22.98475 | -0.13709 |
| H | -15.5667 | 22.49247 | 0.53207  |
| H | -16.1373 | 24.16911 | 0.71106  |

|   |          |          |         |
|---|----------|----------|---------|
| C | -18.3761 | 23.64932 | 2.26252 |
| H | -18.0456 | 24.68975 | 2.39963 |
| H | -18.9264 | 23.34206 | 3.16162 |
| H | -19.0675 | 23.61876 | 1.40795 |

**3aN-2**

|    |          |          |          |
|----|----------|----------|----------|
| Pt | -16.9573 | 17.19864 | 2.65097  |
| Fe | -14.5742 | 17.79428 | -0.96688 |
| P  | -17.7228 | 17.62047 | 0.42462  |
| P  | -14.7293 | 16.20629 | 2.05879  |
| Cl | -16.4279 | 16.636   | 5.02454  |
| C  | -18.8466 | 17.85091 | 3.37903  |
| C  | -13.4062 | 18.29843 | 3.32722  |
| H  | -14.2863 | 18.87997 | 3.05704  |
| C  | -16.2346 | 18.4253  | -2.00096 |
| H  | -16.7664 | 17.82247 | -2.72754 |
| C  | -19.2052 | 18.66812 | 0.13313  |
| C  | -17.9713 | 14.83933 | 0.1724   |
| H  | -17.5871 | 14.82109 | 1.1933   |
| C  | -15.4948 | 19.35667 | -0.00197 |
| H  | -15.4071 | 19.58562 | 1.05449  |
| N  | -16.9233 | 20.22092 | 3.70751  |
| C  | -12.6756 | 17.0505  | -1.39883 |
| H  | -11.9146 | 17.55716 | -1.98346 |
| C  | -19.0695 | 20.01123 | -0.24823 |
| H  | -18.0815 | 20.43778 | -0.40617 |
| C  | -19.858  | 16.88379 | 3.4267   |

|   |          |          |          |
|---|----------|----------|----------|
| H | -19.6542 | 15.87054 | 3.0814   |
| C | -19.128  | 19.14347 | 3.88085  |
| C | -21.1373 | 17.17761 | 3.91766  |
| H | -21.9008 | 16.39859 | 3.9383   |
| C | -16.1051 | 21.32592 | 4.04574  |
| C | -15.9744 | 22.41816 | 3.15166  |
| C | -21.4315 | 18.46508 | 4.37592  |
| H | -22.4246 | 18.7105  | 4.75159  |
| C | -20.2018 | 20.80615 | -0.44991 |
| H | -20.0818 | 21.84614 | -0.75107 |
| C | -16.8103 | 22.48772 | 1.88466  |
| H | -17.1084 | 21.45938 | 1.64002  |
| C | -18.1616 | 20.2328  | 4.04478  |
| H | -18.5854 | 21.11814 | 4.54846  |
| C | -14.6912 | 19.87587 | -1.05925 |
| H | -13.849  | 20.54977 | -0.94038 |
| C | -16.4625 | 18.44771 | -0.57573 |
| C | -21.6203 | 18.92948 | 0.10482  |
| H | -22.6123 | 18.4998  | 0.2386   |
| C | -13.6811 | 16.1685  | -1.90743 |
| H | -13.8226 | 15.89083 | -2.9471  |
| C | -14.4996 | 15.74828 | -0.81364 |
| H | -15.361  | 15.09263 | -0.87998 |
| C | -13.998  | 16.36726 | 0.3894   |
| C | -21.4795 | 20.26875 | -0.27537 |
| H | -22.3615 | 20.88681 | -0.4389  |
| C | -12.8609 | 17.17083 | 0.01275  |

|   |          |          |          |
|---|----------|----------|----------|
| H | -12.2646 | 17.77993 | 0.68402  |
| C | -20.492  | 18.13399 | 0.31064  |
| H | -20.6187 | 17.09271 | 0.59902  |
| C | -15.3618 | 21.2791  | 5.2554   |
| C | -18.1616 | 16.07332 | -0.46593 |
| C | -18.9814 | 14.89964 | -2.42886 |
| H | -19.3826 | 14.92688 | -3.44191 |
| C | -18.7674 | 13.67085 | -1.79281 |
| H | -18.9928 | 12.74114 | -2.3141  |
| C | -15.1405 | 19.30036 | -2.28828 |
| H | -14.7001 | 19.46455 | -3.26654 |
| C | -18.2717 | 13.64256 | -0.4868  |
| H | -18.1135 | 12.69182 | 0.0211   |
| C | -18.6901 | 16.09524 | -1.76932 |
| H | -18.8933 | 17.04216 | -2.26683 |
| C | -13.3724 | 16.91899 | 3.07123  |
| C | -14.6531 | 14.38302 | 2.30978  |
| C | -20.4264 | 19.42896 | 4.36371  |
| H | -20.6311 | 20.42796 | 4.75329  |
| C | -12.2777 | 16.16216 | 3.51181  |
| H | -12.2502 | 15.08637 | 3.34783  |
| C | -15.5743 | 13.77239 | 3.17774  |
| H | -16.2838 | 14.38965 | 3.72856  |
| C | -11.2276 | 18.1712  | 4.37434  |
| H | -10.3888 | 18.65784 | 4.87156  |
| C | -12.328  | 18.92482 | 3.95549  |
| H | -12.359  | 19.99916 | 4.1309   |

|   |          |          |         |
|---|----------|----------|---------|
| C | -15.0889 | 23.45234 | 3.48627 |
| H | -14.9824 | 24.30322 | 2.81399 |
| C | -13.7203 | 12.19365 | 1.80478 |
| H | -12.996  | 11.58382 | 1.26563 |
| C | -14.4914 | 22.33917 | 5.5412  |
| H | -13.9154 | 22.31852 | 6.46531 |
| C | -11.2142 | 16.78759 | 4.16897 |
| H | -10.3711 | 16.19045 | 4.51427 |
| C | -15.5506 | 20.12561 | 6.22963 |
| H | -15.8447 | 19.2446  | 5.64166 |
| C | -13.7255 | 13.57957 | 1.62309 |
| H | -13.0125 | 14.02958 | 0.9339  |
| C | -14.3481 | 23.42026 | 4.66819 |
| H | -13.6663 | 24.23576 | 4.90959 |
| C | -15.5657 | 12.38559 | 3.35536 |
| H | -16.2866 | 11.92737 | 4.03216 |
| C | -14.6413 | 11.5923  | 2.6686  |
| H | -14.6375 | 10.51162 | 2.8062  |
| C | -16.6941 | 20.42667 | 7.21874 |
| H | -16.8538 | 19.5679  | 7.88507 |
| H | -17.6392 | 20.63056 | 6.69997 |
| H | -16.4512 | 21.3031  | 7.83676 |
| C | -14.2843 | 19.75106 | 7.01055 |
| H | -13.9822 | 20.53965 | 7.71479 |
| H | -13.4406 | 19.54747 | 6.34079 |
| H | -14.4738 | 18.84327 | 7.59924 |
| C | -16.0473 | 23.05318 | 0.67796 |

|   |          |          |          |
|---|----------|----------|----------|
| H | -16.6568 | 22.95916 | -0.23131 |
| H | -15.1039 | 22.51795 | 0.51141  |
| H | -15.8144 | 24.11887 | 0.80733  |
| C | -18.0999 | 23.29774 | 2.122    |
| H | -17.8548 | 24.33499 | 2.39095  |
| H | -18.6992 | 22.87276 | 2.93716  |
| H | -18.7213 | 23.31495 | 1.21619  |

**3bN**

|    |          |          |          |
|----|----------|----------|----------|
| Pt | -21.4899 | 35.70039 | 8.51353  |
| Cl | -23.0073 | 35.64349 | 6.5528   |
| P  | -20.0045 | 35.8199  | 10.3741  |
| P  | -19.687  | 36.91071 | 7.31094  |
| N  | -22.8126 | 31.25511 | 8.46822  |
| C  | -22.9901 | 34.72349 | 9.70736  |
| C  | -23.681  | 35.47252 | 10.67206 |
| H  | -23.4701 | 36.53542 | 10.79419 |
| C  | -24.6364 | 34.88289 | 11.50983 |
| H  | -25.1596 | 35.4928  | 12.24806 |
| C  | -24.9096 | 33.51342 | 11.40066 |
| H  | -25.6486 | 33.04414 | 12.05129 |
| C  | -24.244  | 32.75838 | 10.441   |
| H  | -24.4574 | 31.69628 | 10.31994 |
| C  | -23.2928 | 33.34795 | 9.58102  |
| C  | -22.6788 | 32.53372 | 8.52475  |
| H  | -22.149  | 33.09916 | 7.74205  |
| C  | -22.2979 | 30.52204 | 7.3821   |



|   |          |          |         |
|---|----------|----------|---------|
| C | -23.2407 | 29.76238 | 6.63405 |
| C | -22.7926 | 29.0224  | 5.53749 |
| H | -23.5084 | 28.4535  | 4.94422 |
| C | -21.4395 | 28.9968  | 5.18976 |
| H | -21.105  | 28.41936 | 4.32715 |
| C | -20.5184 | 29.69717 | 5.96569 |
| H | -19.4598 | 29.64983 | 5.70636 |
| C | -20.9142 | 30.46348 | 7.07268 |
| C | -24.7125 | 29.80985 | 7.01451 |
| H | -24.7404 | 30.03823 | 8.09058 |
| C | -25.4471 | 28.48121 | 6.79441 |
| H | -25.5513 | 28.24022 | 5.72714 |
| H | -24.9236 | 27.64812 | 7.28343 |
| H | -26.4605 | 28.54243 | 7.21496 |
| C | -25.4363 | 30.95981 | 6.29006 |
| H | -25.4436 | 30.78625 | 5.20397 |
| H | -26.479  | 31.03245 | 6.63141 |
| H | -24.946  | 31.9238  | 6.47729 |
| C | -19.8471 | 31.14829 | 7.9182  |
| H | -20.3396 | 31.60706 | 8.78533 |
| C | -18.8257 | 30.1349  | 8.46513 |
| H | -18.2592 | 29.65938 | 7.65223 |
| H | -18.106  | 30.64241 | 9.12332 |
| H | -19.3212 | 29.34282 | 9.04206 |
| C | -19.1372 | 32.26872 | 7.14335 |
| H | -19.8442 | 33.0364  | 6.80558 |
| H | -18.3826 | 32.75613 | 7.77662 |

|   |          |          |          |
|---|----------|----------|----------|
| H | -18.6248 | 31.87369 | 6.2551   |
| C | -19.6484 | 34.37675 | 11.44027 |
| C | -20.7272 | 33.70646 | 12.05617 |
| H | -21.7475 | 34.05741 | 11.90187 |
| C | -20.4967 | 32.59208 | 12.86308 |
| H | -21.343  | 32.07821 | 13.32758 |
| C | -19.1923 | 32.12325 | 13.05713 |
| H | -19.0158 | 31.24663 | 13.68045 |
| C | -18.1148 | 32.78673 | 12.45512 |
| H | -17.0936 | 32.43176 | 12.60534 |
| C | -18.3394 | 33.90382 | 11.64456 |
| H | -17.481  | 34.40236 | 11.19001 |
| C | -20.4375 | 37.17699 | 11.53092 |
| C | -19.9561 | 37.20136 | 12.84952 |
| H | -19.3505 | 36.37745 | 13.22728 |
| C | -20.2594 | 38.27786 | 13.68642 |
| H | -19.8867 | 38.28639 | 14.71041 |
| C | -21.0412 | 39.33711 | 13.21497 |
| H | -21.2775 | 40.17415 | 13.87179 |
| C | -21.5252 | 39.31749 | 11.90449 |
| H | -22.1426 | 40.13604 | 11.53504 |
| C | -21.2312 | 38.23804 | 11.06754 |
| H | -21.6344 | 38.20739 | 10.054   |
| C | -18.3504 | 36.33624 | 9.70186  |
| H | -17.8853 | 35.44306 | 9.26249  |
| H | -17.7111 | 36.68297 | 10.52506 |
| C | -18.5085 | 37.43329 | 8.64449  |

|            |          |          |         |
|------------|----------|----------|---------|
| H          | -18.9452 | 38.33824 | 9.0908  |
| H          | -17.5339 | 37.72599 | 8.2313  |
| C          | -20.0813 | 38.46395 | 6.42904 |
| C          | -21.3591 | 39.02319 | 6.57682 |
| H          | -22.1134 | 38.49804 | 7.16314 |
| C          | -21.6723 | 40.23101 | 5.94704 |
| H          | -22.6696 | 40.6554  | 6.06096 |
| C          | -20.7158 | 40.88241 | 5.16438 |
| H          | -20.9626 | 41.82137 | 4.66912 |
| C          | -19.4428 | 40.32299 | 5.00653 |
| H          | -18.6956 | 40.82362 | 4.39043 |
| C          | -19.1256 | 39.11639 | 5.63264 |
| H          | -18.137  | 38.67852 | 5.49118 |
| C          | -18.7042 | 35.9449  | 6.10707 |
| C          | -17.3358 | 35.67674 | 6.26232 |
| H          | -16.7835 | 36.06062 | 7.11882 |
| C          | -16.6573 | 34.90757 | 5.31176 |
| H          | -15.5953 | 34.70187 | 5.4455  |
| C          | -17.335  | 34.40726 | 4.19792 |
| H          | -16.8042 | 33.80632 | 3.45936 |
| C          | -18.7003 | 34.67007 | 4.03887 |
| H          | -19.2375 | 34.27429 | 3.17743 |
| C          | -19.3843 | 35.42733 | 4.98984 |
| H          | -20.4546 | 35.60617 | 4.87727 |
| <b>3bC</b> |          |          |         |
| Pt         | -21.5267 | 34.63841 | 9.10689 |

|    |          |          |          |
|----|----------|----------|----------|
| Cl | -23.9874 | 35.90205 | 8.65038  |
| P  | -20.0083 | 35.66434 | 10.62844 |
| P  | -20.078  | 35.73777 | 7.34777  |
| N  | -22.3156 | 32.65437 | 8.13262  |
| C  | -22.7208 | 33.79159 | 10.6489  |
| C  | -23.0509 | 34.34201 | 11.88899 |
| H  | -22.6111 | 35.28438 | 12.21373 |
| C  | -23.9654 | 33.70632 | 12.73996 |
| H  | -24.1971 | 34.15952 | 13.70517 |
| C  | -24.5813 | 32.5059  | 12.36667 |
| H  | -25.2943 | 32.02009 | 13.03261 |
| C  | -24.2829 | 31.9498  | 11.12662 |
| H  | -24.7663 | 31.02641 | 10.80239 |
| C  | -23.3628 | 32.58433 | 10.26754 |
| C  | -23.0981 | 32.0363  | 8.9619   |
| H  | -23.5697 | 31.08743 | 8.67529  |
| C  | -22.0169 | 32.04052 | 6.8806   |
| C  | -22.7757 | 32.38608 | 5.73778  |
| C  | -22.4483 | 31.76201 | 4.52667  |
| H  | -23.021  | 32.00331 | 3.63128  |
| C  | -21.4091 | 30.83231 | 4.44707  |
| H  | -21.1783 | 30.35376 | 3.49454  |
| C  | -20.6654 | 30.52003 | 5.58488  |
| H  | -19.8474 | 29.80296 | 5.51154  |
| C  | -20.9416 | 31.12342 | 6.81857  |
| C  | -23.9406 | 33.36039 | 5.84013  |
| H  | -23.7724 | 33.99399 | 6.72326  |

|   |          |          |          |
|---|----------|----------|----------|
| C | -25.2633 | 32.60374 | 6.0648   |
| H | -25.4977 | 31.96414 | 5.2007   |
| H | -25.2189 | 31.96363 | 6.9562   |
| H | -26.0889 | 33.3164  | 6.2014   |
| C | -24.0598 | 34.29391 | 4.62774  |
| H | -24.3374 | 33.75087 | 3.71286  |
| H | -24.8415 | 35.04157 | 4.81855  |
| H | -23.1204 | 34.83096 | 4.44239  |
| C | -20.1268 | 30.78575 | 8.06042  |
| H | -20.3098 | 31.58741 | 8.79014  |
| C | -20.5945 | 29.46137 | 8.69034  |
| H | -20.4266 | 28.62248 | 7.99932  |
| H | -20.0354 | 29.25963 | 9.61554  |
| H | -21.6648 | 29.48289 | 8.93609  |
| C | -18.6133 | 30.75425 | 7.80105  |
| H | -18.2665 | 31.69668 | 7.35891  |
| H | -18.0804 | 30.59887 | 8.74981  |
| H | -18.3288 | 29.93464 | 7.12603  |
| C | -19.0663 | 34.66215 | 11.84704 |
| C | -19.5726 | 33.42374 | 12.27073 |
| H | -20.5208 | 33.06858 | 11.86865 |
| C | -18.8656 | 32.64417 | 13.18986 |
| H | -19.2747 | 31.68608 | 13.5106  |
| C | -17.6367 | 33.08644 | 13.68693 |
| H | -17.082  | 32.47595 | 14.39974 |
| C | -17.1165 | 34.31093 | 13.2598  |
| H | -16.1545 | 34.6593  | 13.63621 |

|   |          |          |          |
|---|----------|----------|----------|
| C | -17.8243 | 35.09644 | 12.34669 |
| H | -17.3946 | 36.04462 | 12.02594 |
| C | -20.744  | 37.06015 | 11.57724 |
| C | -20.2033 | 37.53472 | 12.7838  |
| H | -19.3521 | 37.03389 | 13.24369 |
| C | -20.7625 | 38.64888 | 13.41447 |
| H | -20.3373 | 39.00416 | 14.35342 |
| C | -21.8645 | 39.29852 | 12.84909 |
| H | -22.3    | 40.1667  | 13.3437  |
| C | -22.4153 | 38.82049 | 11.6578  |
| H | -23.2881 | 39.30593 | 11.22106 |
| C | -21.8655 | 37.7023  | 11.0251  |
| H | -22.34   | 37.29952 | 10.12547 |
| C | -18.6527 | 36.49122 | 9.657    |
| H | -17.8738 | 35.73207 | 9.50939  |
| H | -18.2196 | 37.30603 | 10.25279 |
| C | -19.1676 | 37.02829 | 8.32396  |
| H | -19.8987 | 37.8328  | 8.48952  |
| H | -18.3521 | 37.45808 | 7.72516  |
| C | -20.7826 | 36.74188 | 5.97739  |
| C | -22.0929 | 37.22738 | 6.10288  |
| H | -22.7081 | 36.92884 | 6.9577   |
| C | -22.6233 | 38.06458 | 5.11681  |
| H | -23.6445 | 38.43234 | 5.22084  |
| C | -21.8604 | 38.41436 | 4.00035  |
| H | -22.281  | 39.06278 | 3.23119  |
| C | -20.5567 | 37.92407 | 3.86772  |

|   |          |          |         |
|---|----------|----------|---------|
| H | -19.9571 | 38.18935 | 2.9966  |
| C | -20.0167 | 37.093   | 4.8514  |
| H | -19.0009 | 36.716   | 4.73632 |
| C | -18.7591 | 34.77935 | 6.49596 |
| C | -17.393  | 34.952   | 6.77296 |
| H | -17.0614 | 35.65917 | 7.53034 |
| C | -16.4251 | 34.23181 | 6.06602 |
| H | -15.3701 | 34.38232 | 6.2968  |
| C | -16.8079 | 33.33893 | 5.0628  |
| H | -16.0527 | 32.78438 | 4.50502 |
| C | -18.1657 | 33.15837 | 4.78185 |
| H | -18.4785 | 32.45832 | 4.0078  |
| C | -19.1348 | 33.86311 | 5.49779 |
| H | -20.1882 | 33.70273 | 5.26699 |

**3cN**

|    |          |          |          |
|----|----------|----------|----------|
| Pt | -21.9719 | 35.53101 | 8.31085  |
| Cl | -23.5003 | 35.37464 | 6.37873  |
| P  | -20.312  | 35.80647 | 10.00353 |
| P  | -19.9135 | 36.5612  | 7.29375  |
| N  | -22.9459 | 31.07095 | 8.51637  |
| C  | -23.3833 | 34.57001 | 9.58632  |
| C  | -24.0555 | 35.32512 | 10.55705 |
| H  | -23.9131 | 36.40561 | 10.60869 |
| C  | -24.9124 | 34.71417 | 11.48038 |
| H  | -25.4304 | 35.3242  | 12.22244 |
| C  | -25.0972 | 33.3256  | 11.45524 |

|   |          |          |          |
|---|----------|----------|----------|
| H | -25.7581 | 32.84604 | 12.17828 |
| C | -24.4384 | 32.56412 | 10.49552 |
| H | -24.5767 | 31.48357 | 10.44616 |
| C | -23.5844 | 33.17134 | 9.55043  |
| C | -22.9411 | 32.3579  | 8.5122   |
| H | -22.4808 | 32.93008 | 7.69081  |
| C | -22.3455 | 30.35941 | 7.45773  |
| C | -23.1913 | 29.49873 | 6.70411  |
| C | -22.6435 | 28.77547 | 5.64172  |
| H | -23.2881 | 28.13146 | 5.04344  |
| C | -21.2837 | 28.86482 | 5.3328   |
| H | -20.8717 | 28.30012 | 4.49574  |
| C | -20.4555 | 29.66855 | 6.1128   |
| H | -19.3895 | 29.71511 | 5.88446  |
| C | -20.9547 | 30.42496 | 7.18382  |
| C | -24.6729 | 29.42251 | 7.03795  |
| H | -24.7584 | 29.67539 | 8.10577  |
| C | -25.2751 | 28.02612 | 6.83314  |
| H | -25.3137 | 27.74788 | 5.77006  |
| H | -24.6953 | 27.25785 | 7.36373  |
| H | -26.3059 | 28.0036  | 7.21416  |
| C | -25.4732 | 30.48238 | 6.25799  |
| H | -25.4273 | 30.28452 | 5.17691  |
| H | -26.5295 | 30.4674  | 6.56386  |
| H | -25.0805 | 31.49231 | 6.43542  |
| C | -19.9794 | 31.2418  | 8.02389  |
| H | -20.5336 | 31.68522 | 8.86086  |



|   |          |          |          |
|---|----------|----------|----------|
| C | -18.8735 | 30.36193 | 8.63211  |
| H | -18.2304 | 29.92819 | 7.8531   |
| H | -18.2366 | 30.96371 | 9.29658  |
| H | -19.2998 | 29.53724 | 9.21918  |
| C | -19.368  | 32.39416 | 7.21304  |
| H | -20.1405 | 33.08576 | 6.85413  |
| H | -18.6571 | 32.9605  | 7.8317   |
| H | -18.8198 | 32.02281 | 6.33574  |
| C | -19.7624 | 34.4961  | 11.14466 |
| C | -20.7315 | 33.8494  | 11.93175 |
| H | -21.783  | 34.12053 | 11.83968 |
| C | -20.3513 | 32.85018 | 12.82841 |
| H | -21.1105 | 32.35461 | 13.43337 |
| C | -19.0077 | 32.48124 | 12.94323 |
| H | -18.7136 | 31.69551 | 13.63892 |
| C | -18.0416 | 33.1193  | 12.16124 |
| H | -16.9922 | 32.83743 | 12.24668 |
| C | -18.4141 | 34.12477 | 11.26495 |
| H | -17.6458 | 34.61672 | 10.66941 |
| C | -20.5053 | 37.30809 | 11.03149 |
| C | -19.7739 | 37.491   | 12.21603 |
| H | -19.0981 | 36.71381 | 12.57166 |
| C | -19.912  | 38.67472 | 12.94447 |
| H | -19.3436 | 38.81039 | 13.86449 |
| C | -20.7796 | 39.67813 | 12.5012  |
| H | -20.8881 | 40.5975  | 13.07622 |
| C | -21.5143 | 39.49684 | 11.32632 |

|   |          |          |          |
|---|----------|----------|----------|
| H | -22.1986 | 40.27109 | 10.9807  |
| C | -21.3855 | 38.31215 | 10.59864 |
| H | -21.9735 | 38.15977 | 9.69211  |
| C | -18.9142 | 36.15997 | 8.82456  |
| H | -18.3786 | 35.22083 | 8.63454  |
| H | -18.1976 | 36.91874 | 9.16128  |
| C | -19.7501 | 38.36724 | 7.0465   |
| C | -20.8938 | 39.08937 | 6.67238  |
| H | -21.8477 | 38.57335 | 6.55461  |
| C | -20.8097 | 40.46548 | 6.44284  |
| H | -21.7013 | 41.0189  | 6.14935  |
| C | -19.5895 | 41.12794 | 6.59502  |
| H | -19.5264 | 42.20241 | 6.42287  |
| C | -18.4472 | 40.41193 | 6.96869  |
| H | -17.493  | 40.92464 | 7.09084  |
| C | -18.5242 | 39.03629 | 7.18928  |
| H | -17.6243 | 38.49177 | 7.47579  |
| C | -19.0308 | 35.78958 | 5.89033  |
| C | -17.6369 | 35.62496 | 5.86251  |
| H | -17.0178 | 35.96949 | 6.69216  |
| C | -17.0305 | 34.99586 | 4.77259  |
| H | -15.9491 | 34.8583  | 4.76101  |
| C | -17.8091 | 34.53628 | 3.70487  |
| H | -17.3333 | 34.04026 | 2.85817  |
| C | -19.1964 | 34.70474 | 3.72668  |
| H | -19.8071 | 34.33815 | 2.90088  |
| C | -19.8106 | 35.32532 | 4.81805  |

|            |          |          |          |
|------------|----------|----------|----------|
| H          | -20.8972 | 35.42222 | 4.85509  |
| <b>3cC</b> |          |          |          |
| Pt         | -21.8619 | 34.49158 | 9.09588  |
| Cl         | -24.1526 | 35.99527 | 8.52525  |
| P          | -20.3428 | 35.8324  | 10.36954 |
| P          | -20.2363 | 35.61464 | 7.5104   |
| N          | -22.5508 | 32.52069 | 8.15402  |
| C          | -22.934  | 33.59168 | 10.66754 |
| C          | -23.1787 | 34.0956  | 11.946   |
| H          | -22.7565 | 35.05159 | 12.25666 |
| C          | -23.9836 | 33.38857 | 12.85144 |
| H          | -24.1495 | 33.7971  | 13.84956 |
| C          | -24.5743 | 32.17106 | 12.49035 |
| H          | -25.1992 | 31.63017 | 13.20082 |
| C          | -24.3618 | 31.66273 | 11.21204 |
| H          | -24.8259 | 30.72384 | 10.90446 |
| C          | -23.5465 | 32.36269 | 10.30074 |
| C          | -23.2957 | 31.84721 | 8.97862  |
| H          | -23.721  | 30.88156 | 8.67927  |
| C          | -22.1868 | 31.95729 | 6.89513  |
| C          | -22.8541 | 32.39376 | 5.72676  |
| C          | -22.4603 | 31.83846 | 4.50304  |
| H          | -22.966  | 32.14901 | 3.58864  |
| C          | -21.4351 | 30.89291 | 4.43354  |
| H          | -21.1437 | 30.47157 | 3.47056  |
| C          | -20.7816 | 30.48965 | 5.5969   |

|   |          |          |          |
|---|----------|----------|----------|
| H | -19.9761 | 29.75751 | 5.53373  |
| C | -21.1336 | 31.01312 | 6.84813  |
| C | -24.0065 | 33.3814  | 5.82025  |
| H | -23.8553 | 33.98989 | 6.7243   |
| C | -25.3429 | 32.63465 | 5.99146  |
| H | -25.5614 | 32.0211  | 5.10457  |
| H | -25.3265 | 31.97024 | 6.86599  |
| H | -26.1641 | 33.35236 | 6.12724  |
| C | -24.0829 | 34.34987 | 4.63287  |
| H | -24.3632 | 33.84049 | 3.6993   |
| H | -24.846  | 35.11343 | 4.83525  |
| H | -23.1267 | 34.86533 | 4.47309  |
| C | -20.4077 | 30.55768 | 8.10791  |
| H | -20.6404 | 31.28187 | 8.90025  |
| C | -20.9066 | 29.1758  | 8.56897  |
| H | -20.6874 | 28.41152 | 7.80945  |
| H | -20.409  | 28.87996 | 9.50379  |
| H | -21.991  | 29.17109 | 8.74291  |
| C | -18.8802 | 30.55059 | 7.9449   |
| H | -18.5132 | 31.52549 | 7.59979  |
| H | -18.406  | 30.32489 | 8.91081  |
| H | -18.5487 | 29.78621 | 7.22793  |
| C | -18.9775 | 35.04003 | 11.29138 |
| C | -19.2081 | 33.78477 | 11.87655 |
| H | -20.1716 | 33.29489 | 11.73216 |
| C | -18.2077 | 33.16343 | 12.6275  |
| H | -18.3983 | 32.19171 | 13.08363 |

|   |          |          |          |
|---|----------|----------|----------|
| C | -16.965  | 33.78224 | 12.78785 |
| H | -16.1834 | 33.2946  | 13.37058 |
| C | -16.7221 | 35.0242  | 12.1932  |
| H | -15.7536 | 35.50935 | 12.31437 |
| C | -17.7245 | 35.65587 | 11.45269 |
| H | -17.526  | 36.63117 | 11.00692 |
| C | -20.9765 | 37.16006 | 11.46234 |
| C | -20.3082 | 37.60649 | 12.61309 |
| H | -19.3669 | 37.15122 | 12.91885 |
| C | -20.8548 | 38.63842 | 13.38181 |
| H | -20.3302 | 38.97878 | 14.27495 |
| C | -22.0677 | 39.22736 | 13.01062 |
| H | -22.4917 | 40.03101 | 13.61311 |
| C | -22.7429 | 38.77168 | 11.87344 |
| H | -23.6994 | 39.21079 | 11.58872 |
| C | -22.2073 | 37.73665 | 11.10457 |
| H | -22.7601 | 37.34103 | 10.24817 |
| C | -19.5952 | 36.68808 | 8.89637  |
| H | -20.0953 | 37.66095 | 8.79273  |
| H | -18.5132 | 36.87027 | 8.9246   |
| C | -20.6265 | 36.79597 | 6.16066  |
| C | -21.9489 | 37.25148 | 6.03786  |
| H | -22.7204 | 36.87326 | 6.71568  |
| C | -22.2711 | 38.18927 | 5.05172  |
| H | -23.2998 | 38.5385  | 4.95882  |
| C | -21.2861 | 38.67135 | 4.18641  |
| H | -21.5429 | 39.39789 | 3.41532  |

|   |          |          |         |
|---|----------|----------|---------|
| C | -19.968  | 38.21607 | 4.3069  |
| H | -19.1956 | 38.5866  | 3.63273 |
| C | -19.6361 | 37.2822  | 5.28997 |
| H | -18.6086 | 36.92754 | 5.37108 |
| C | -18.8183 | 34.66723 | 6.84763 |
| C | -17.5786 | 34.57111 | 7.50183 |
| H | -17.4096 | 35.07113 | 8.45553 |
| C | -16.5373 | 33.82656 | 6.93641 |
| H | -15.5748 | 33.77085 | 7.44965 |
| C | -16.725  | 33.16935 | 5.71695 |
| H | -15.91   | 32.59907 | 5.26986 |
| C | -17.9666 | 33.24017 | 5.07258 |
| H | -18.1265 | 32.72088 | 4.12666 |
| C | -19.0095 | 33.97662 | 5.63526 |
| H | -19.9759 | 34.01323 | 5.12777 |
